# Supplementary material for: Role of electrocardiographic early repolarization pattern in long-term outcomes of a community-based middle-aged and geriatric ambulatory population: a prospective cohort study
Source: publisher site journal article supplement (doi:10.18632/aging.202369), 2020-12-19
Supplement: Supplementary file [file aging-v12i24-202369-supplementary-material-SD2.pdf]

**SUPPLEMENTARY FIGURES**

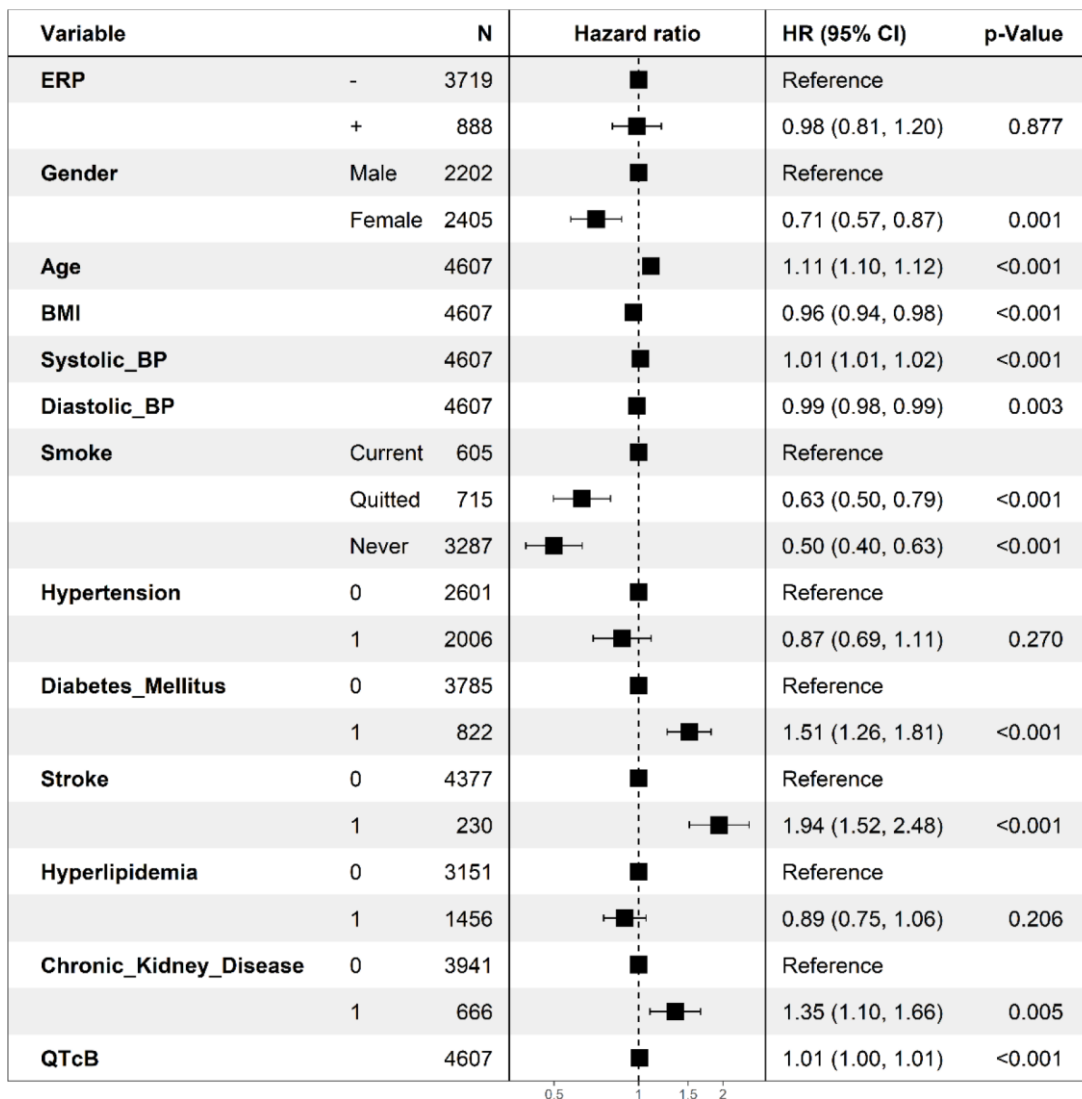

**Supplementary Figure 1. Association between ERP and all-cause mortality.** The hazard ratios and *P*-values were calculated by the Cox proportional hazards model adjusted for all covariables.

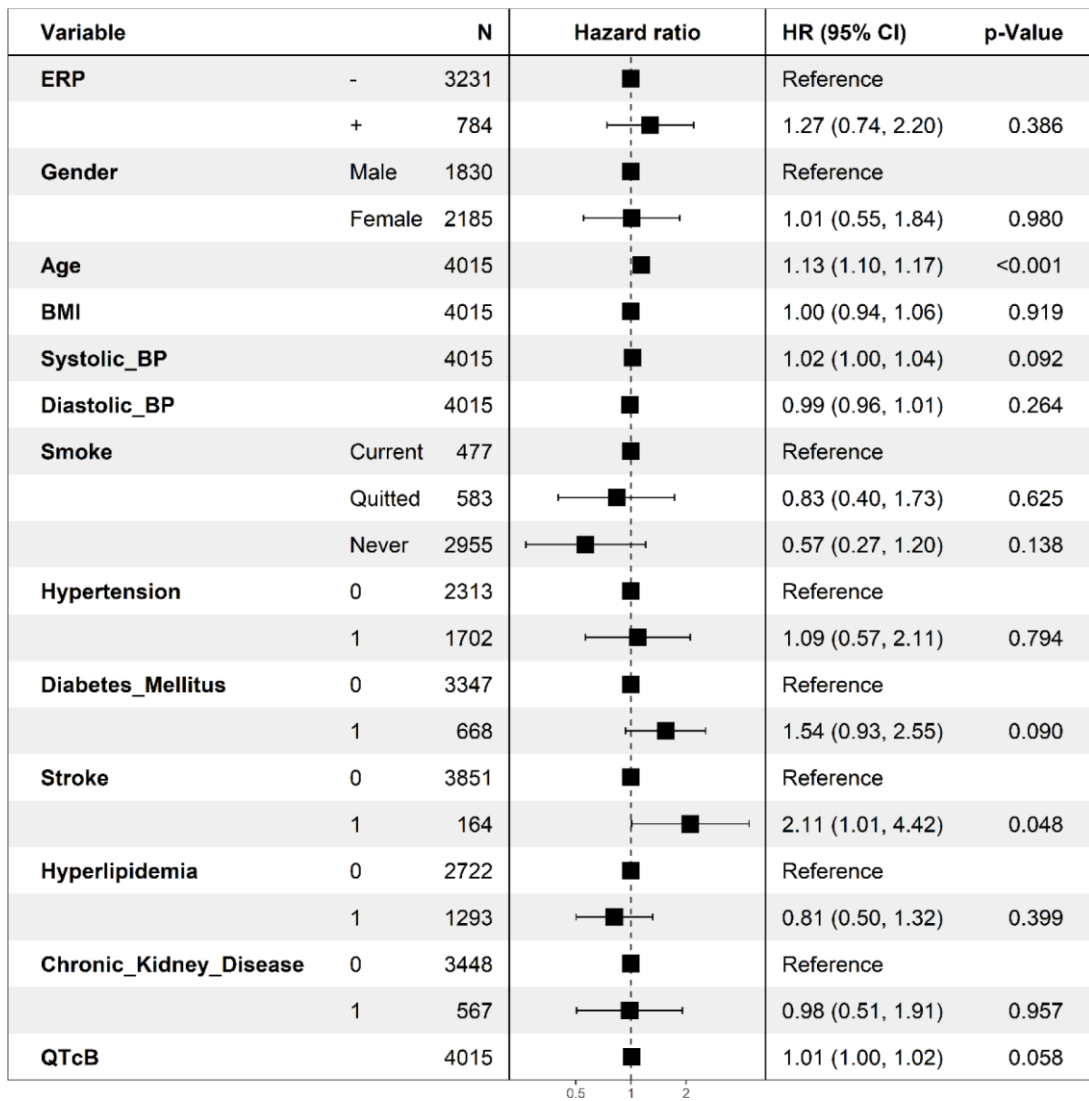

**Supplementary Figure 2. Association between ERP and cardiovascular mortality.** The hazard ratios and *P*-values were calculated by the Cox proportional hazards model adjusted for all covariables.

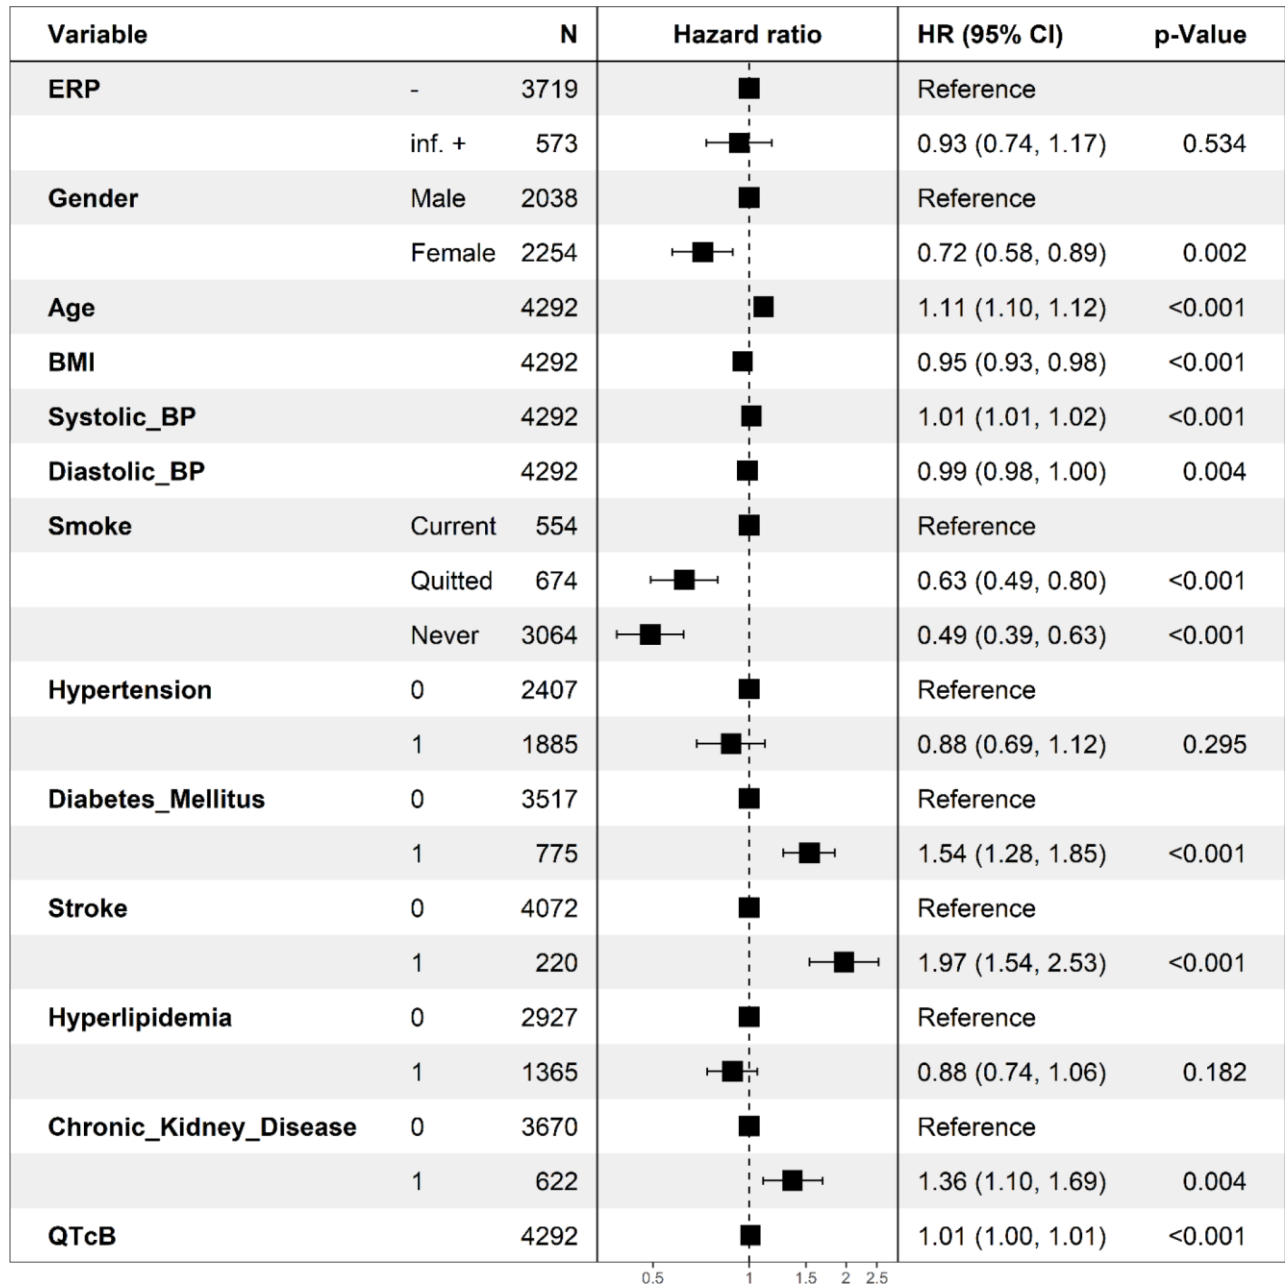

**Supplementary Figure 3. Association between positive ERP in the inferior leads and all-cause mortality.** The hazard ratios and P-values were calculated by the Cox proportional hazards model adjusted for all covariables.

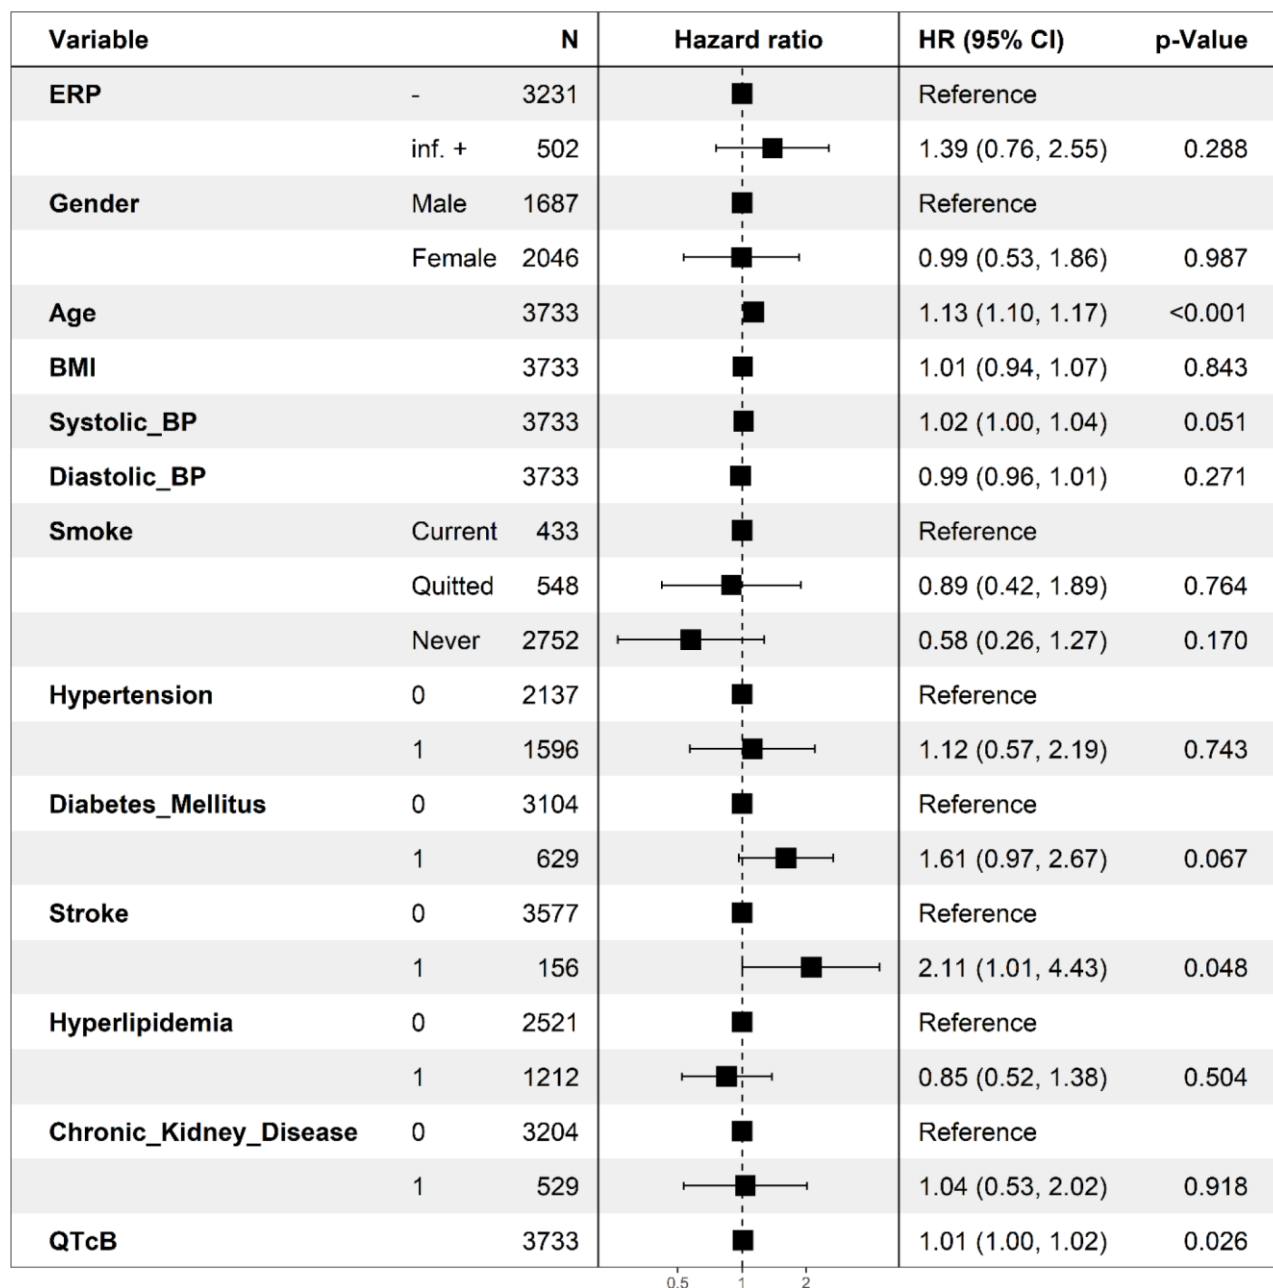

**Supplementary Figure 4. Association between positive ERP in the inferior leads and cardiovascular mortality.** The hazard ratios and *P*-values were calculated by the Cox proportional hazards model after adjusting for covariables.

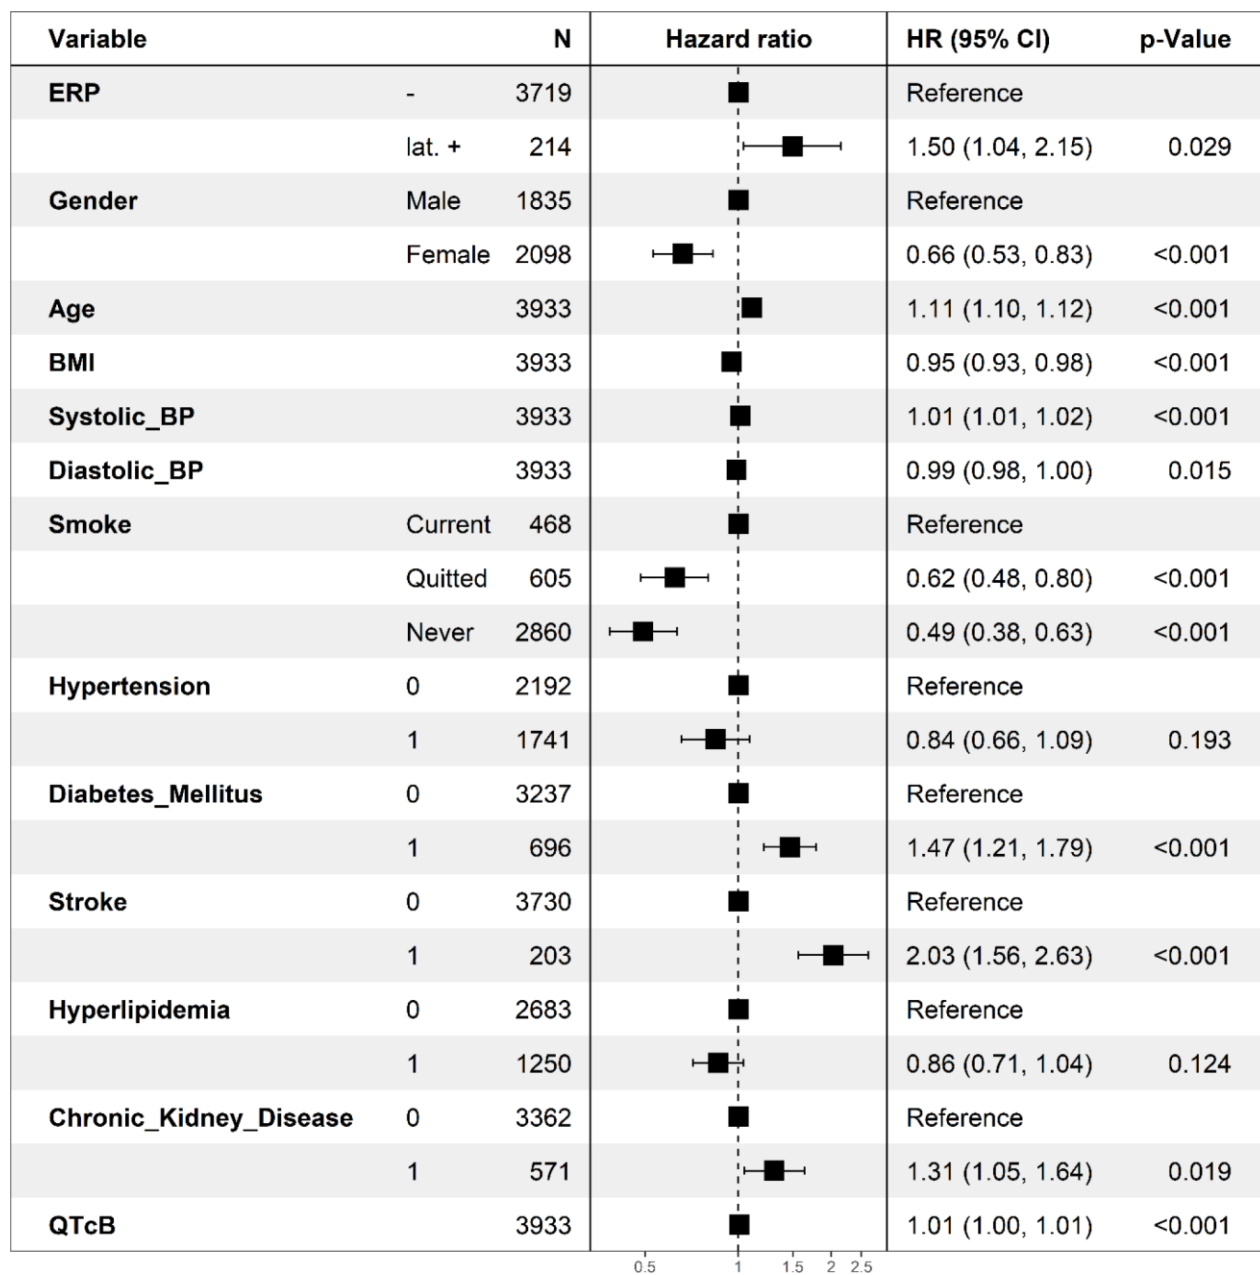

**Supplementary Figure 5. Association between ERP-positive in the lateral leads and all-cause mortality.** The hazard ratios and *P*-values were calculated by the Cox proportional hazards model after adjusting for covariables.

| Variable               |         | N    | Hazard ratio | HR (95% CI)       | p-Value |
|------------------------|---------|------|--------------|-------------------|---------|
| ERP                    | -       | 3719 |              | Reference         |         |
|                        | both +  | 101  |              | 0.41 (0.17, 0.99) | 0.048   |
| Gender                 | Male    | 1793 |              | Reference         |         |
|                        | Female  | 2027 |              | 0.67 (0.54, 0.85) | 0.001   |
| Age                    |         | 3820 |              | 1.11 (1.09, 1.12) | <0.001  |
| BMI                    |         | 3820 |              | 0.95 (0.93, 0.97) | <0.001  |
| Systolic_BP            |         | 3820 |              | 1.02 (1.01, 1.02) | <0.001  |
| Diastolic_BP           |         | 3820 |              | 0.99 (0.98, 1.00) | 0.017   |
| Smoke                  | Current | 457  |              | Reference         |         |
|                        | Quitted | 602  |              | 0.64 (0.50, 0.83) | 0.001   |
|                        | Never   | 2761 |              | 0.50 (0.38, 0.65) | <0.001  |
| Hypertension           | 0       | 2124 |              | Reference         |         |
|                        | 1       | 1696 |              | 0.84 (0.65, 1.08) | 0.176   |
| Diabetes_Mellitus      | 0       | 3143 |              | Reference         |         |
|                        | 1       | 677  |              | 1.51 (1.24, 1.84) | <0.001  |
| Stroke                 | 0       | 3625 |              | Reference         |         |
|                        | 1       | 195  |              | 2.06 (1.58, 2.69) | <0.001  |
| Hyperlipidemia         | 0       | 2605 |              | Reference         |         |
|                        | 1       | 1215 |              | 0.89 (0.74, 1.08) | 0.236   |
| Chronic_Kidney_Disease | 0       | 3267 |              | Reference         |         |
|                        | 1       | 553  |              | 1.34 (1.07, 1.68) | 0.012   |
| QTcB                   |         | 3820 |              | 1.01 (1.00, 1.01) | <0.001  |

**Supplementary Figure 6. Association between positive ERP in both the inferior and lateral leads and all-cause mortality.** The hazard ratios and *P*-values were calculated by the Cox proportional hazards model after adjusting for covariables.

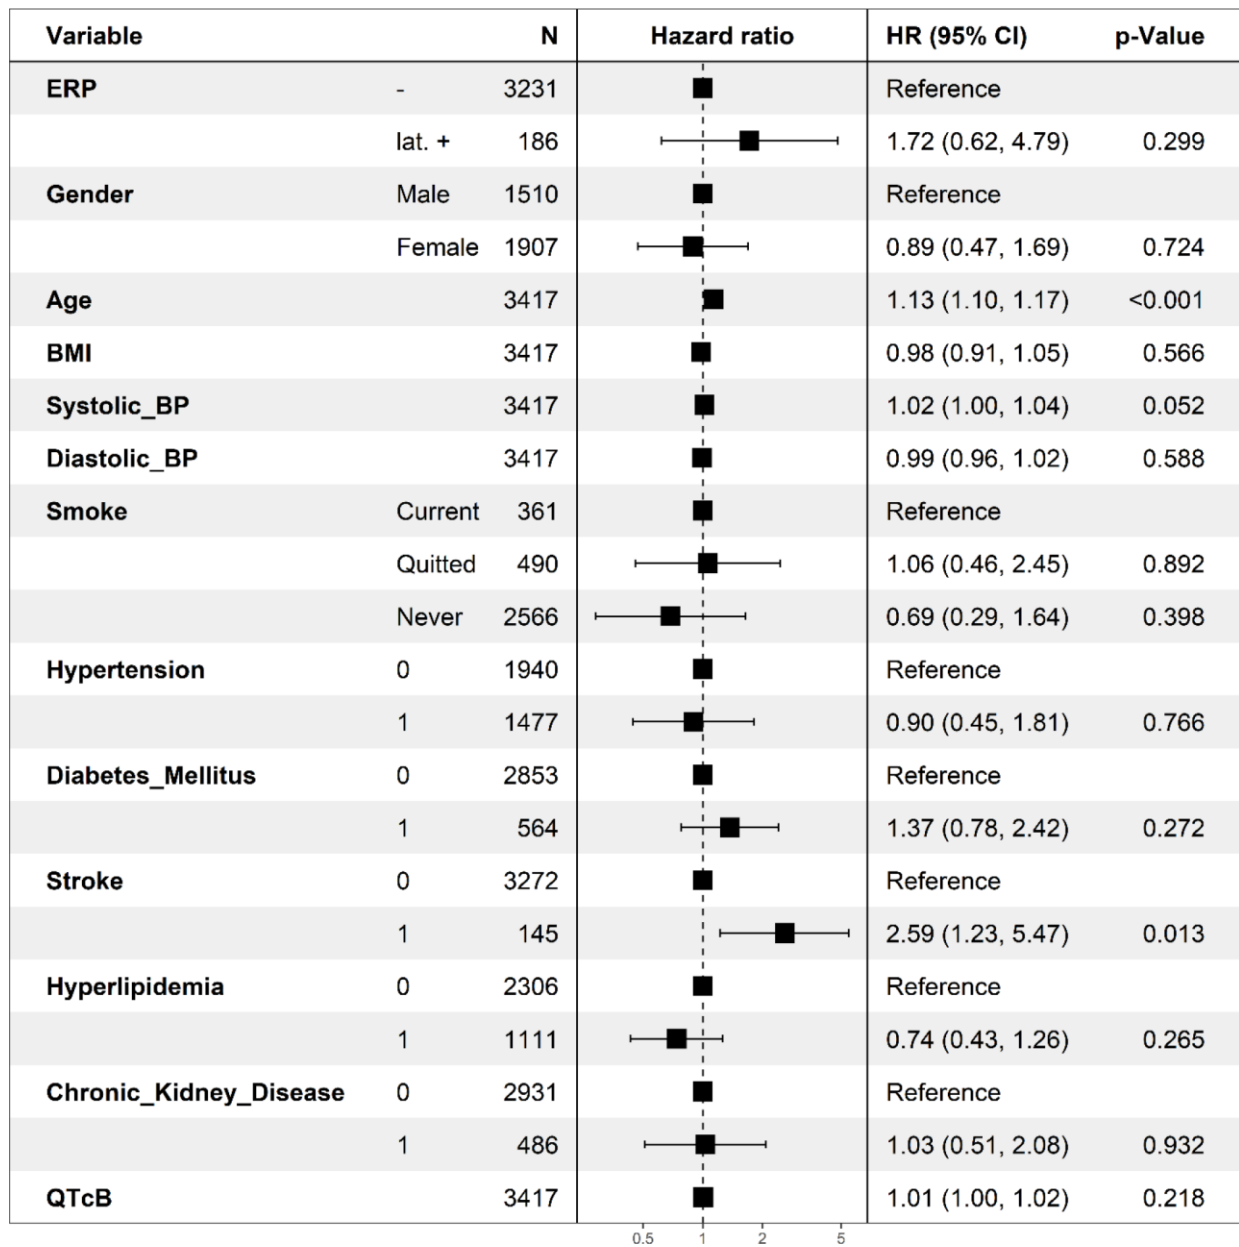

**Supplementary Figure 7. Association between positive ERP in the lateral leads and cardiovascular mortality.** The hazard ratios and *P*-values were calculated by the Cox proportional hazards model after adjusting for covariables.

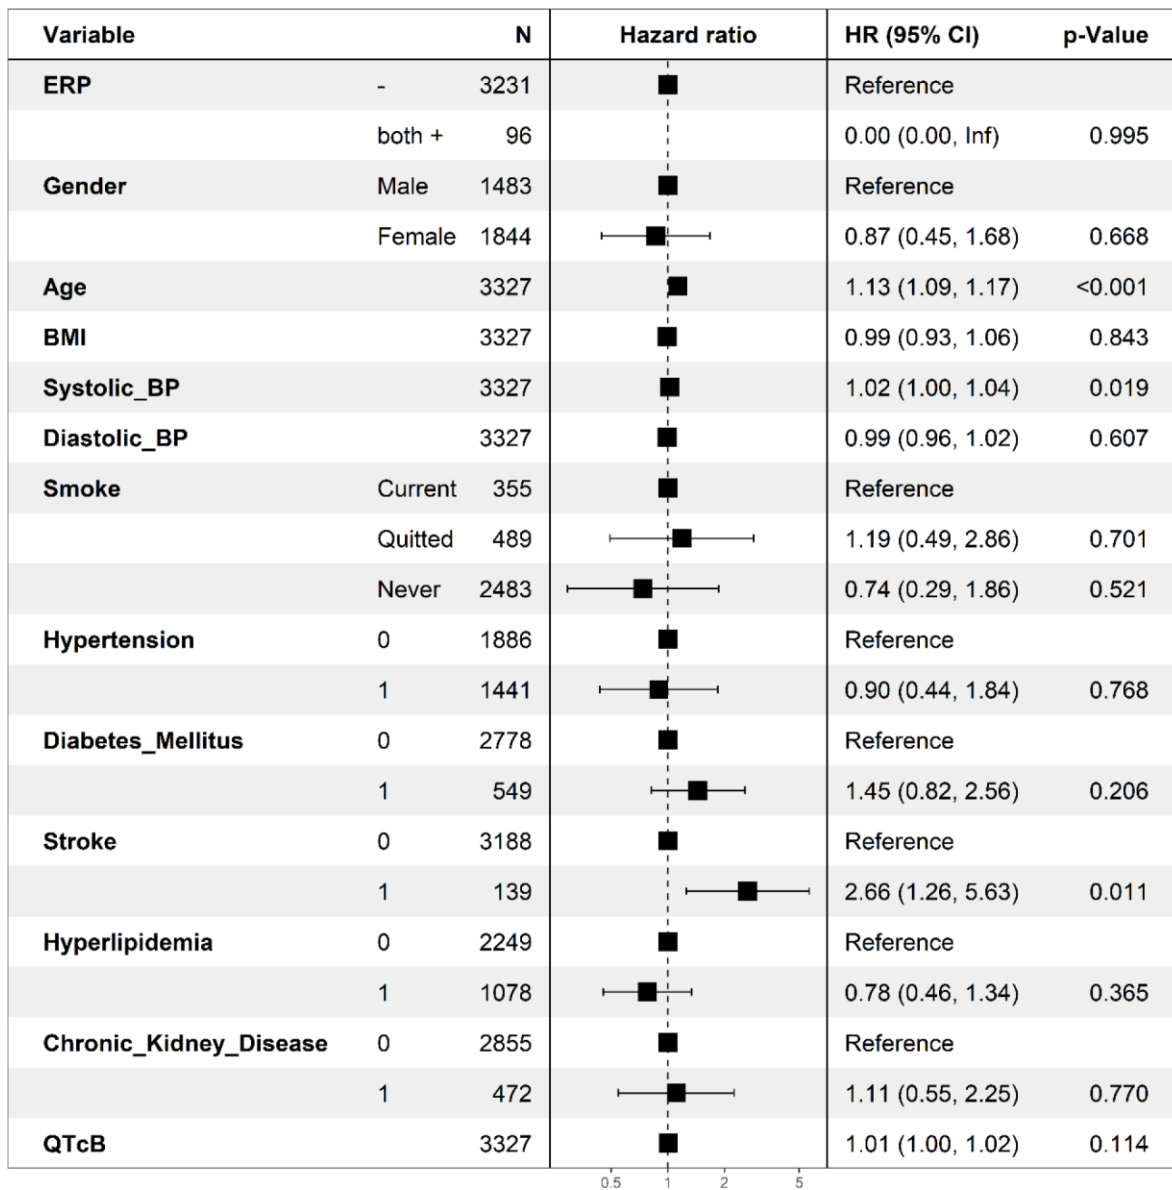

**Supplementary Figure 8. Association between positive ERP in both inferior and lateral leads and cardiovascular mortality.** The hazard ratios and *P*-values were calculated by the Cox proportional hazards model after adjusting for covariables.



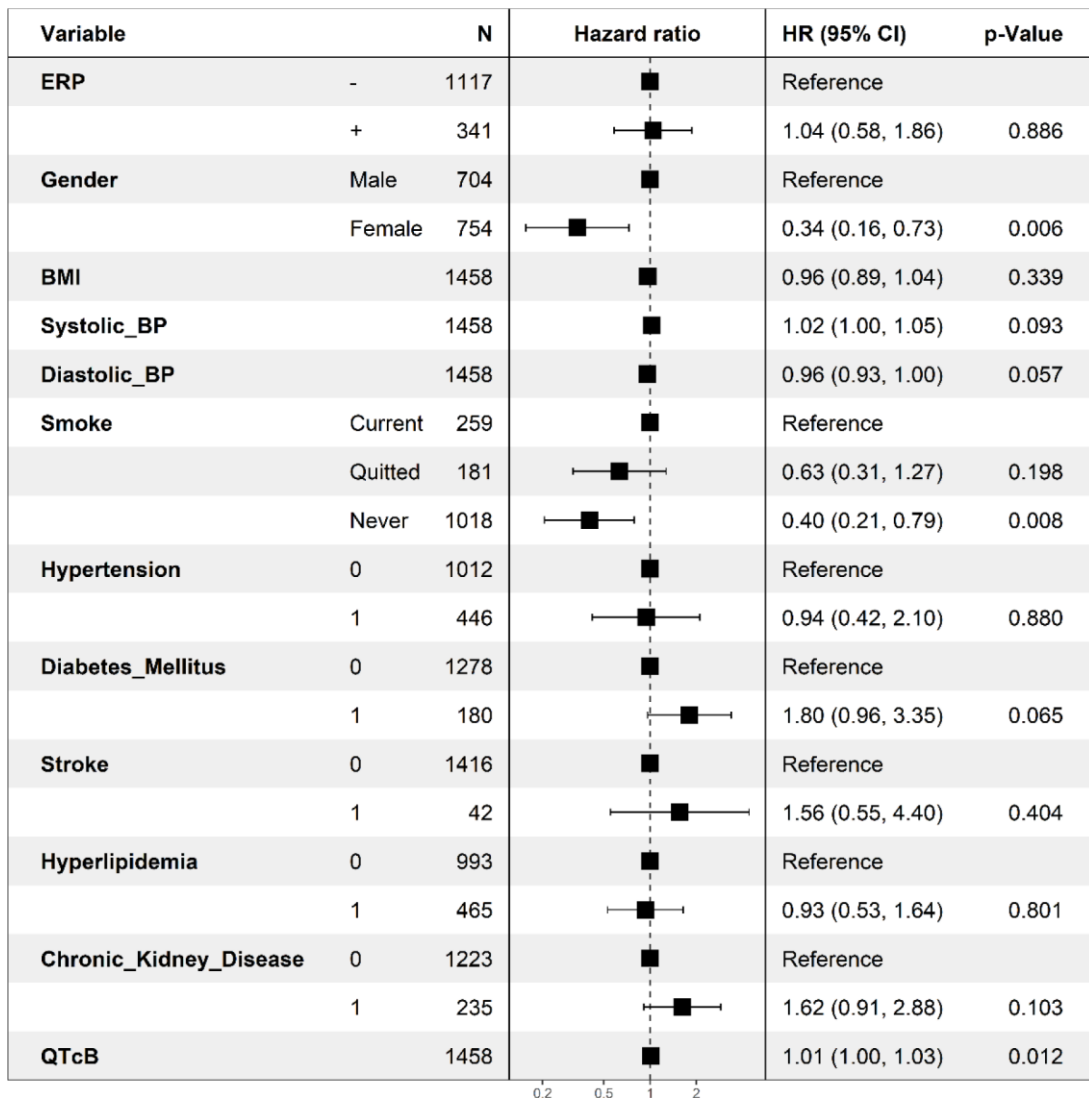

**Supplementary Figure 9. Association between ERP and all-cause mortality among individuals aged 55-64 years.** The hazard ratios and *P*-values were calculated by the Cox proportional hazards model after adjusting for covariables.

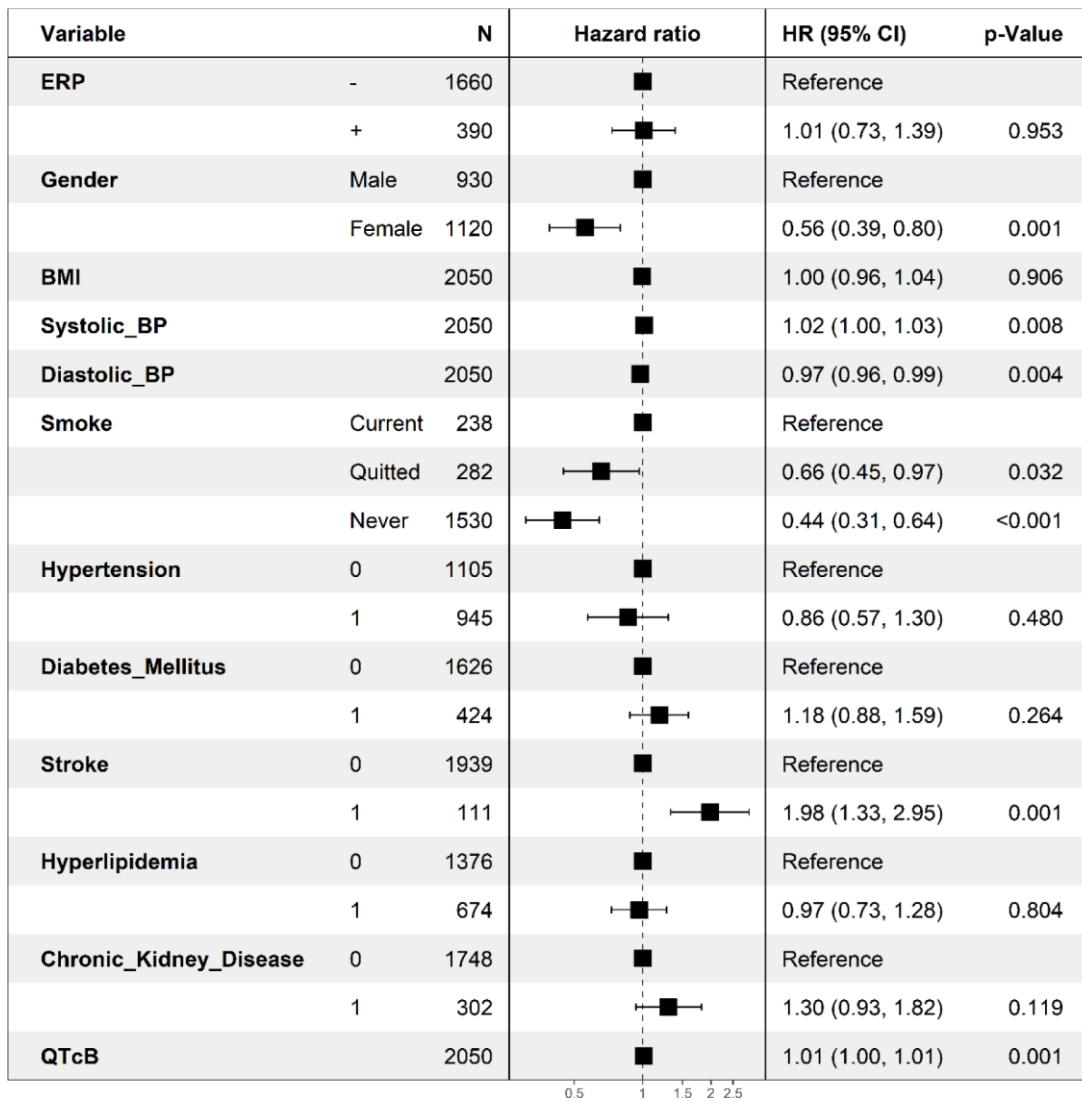

**Supplementary Figure 10. Association between ERP and all-cause mortality among individuals aged 65-74 years.** The hazard ratios and *P*-values were calculated by the Cox proportional hazards model after adjusting for covariables.

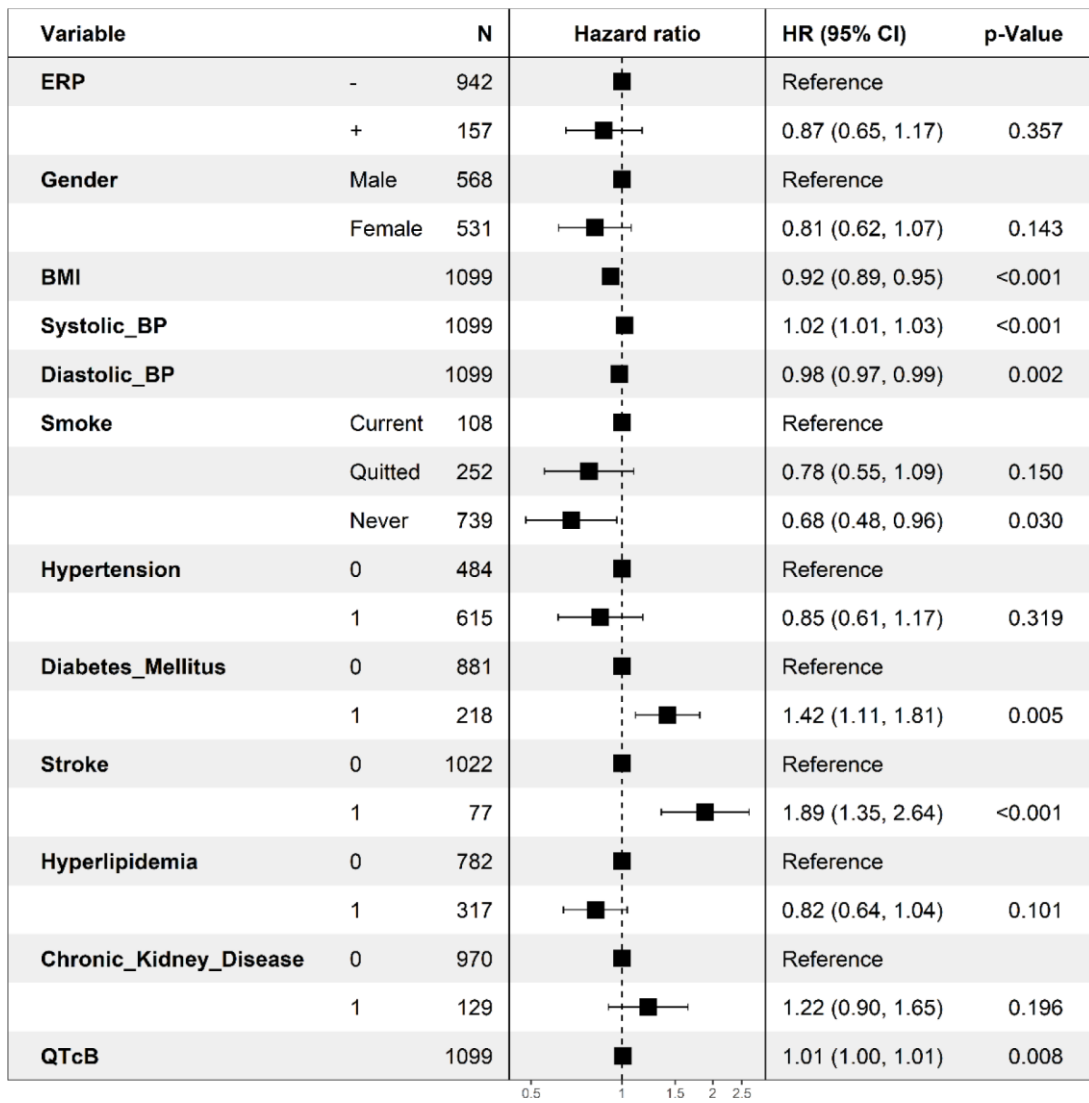

**Supplementary Figure 11. Association between ERP and all-cause mortality among individuals aged  $\geq 75$  years.** The hazard ratios and *P*-values were calculated by the Cox proportional hazards model after adjusting for covariables.

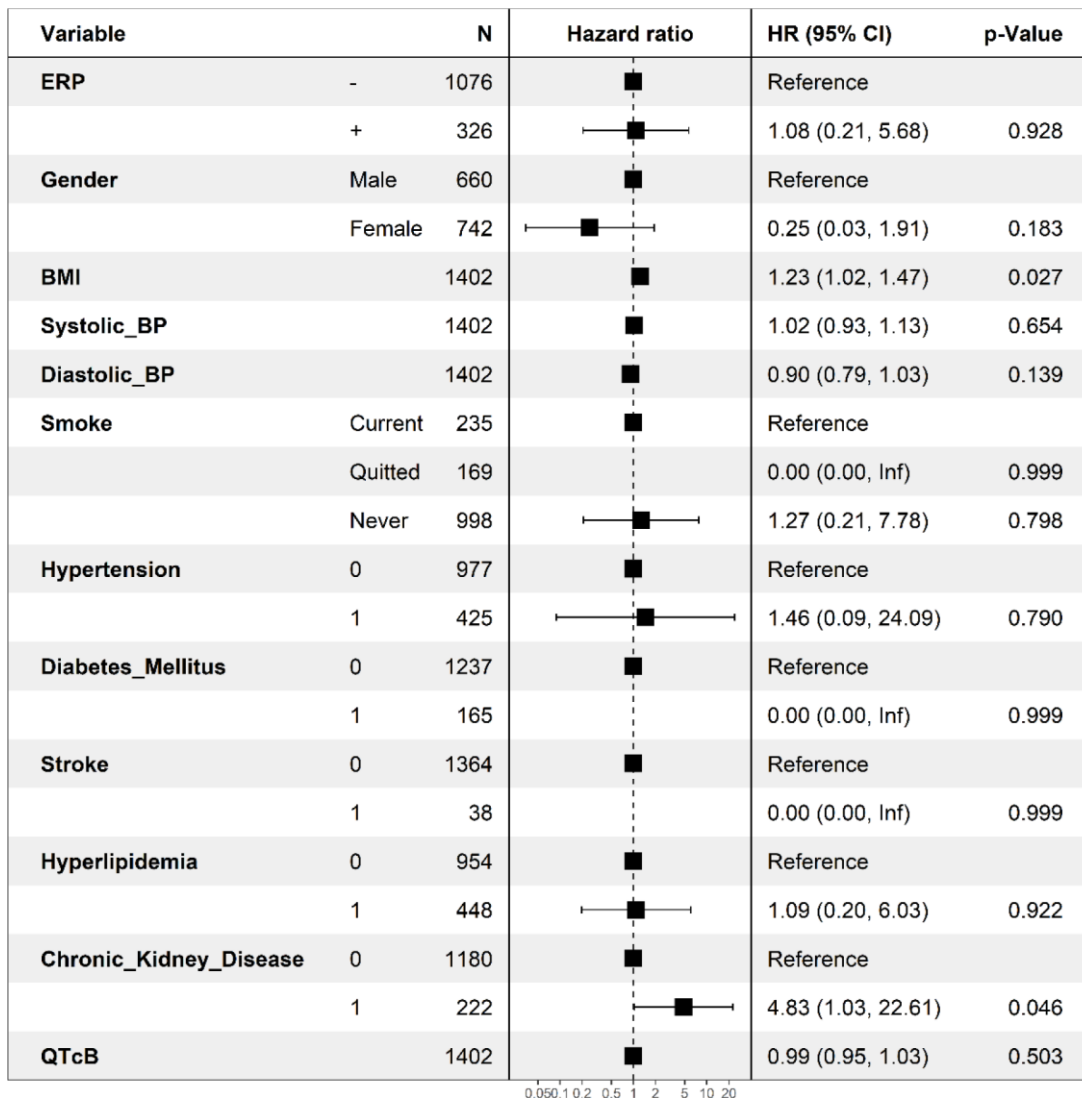

**Supplementary Figure 12. Association between ERP and cardiovascular mortality among individuals aged 55-64 years.** The hazard ratios and *P*-values were calculated by the Cox proportional hazards model after adjusting for covariables.

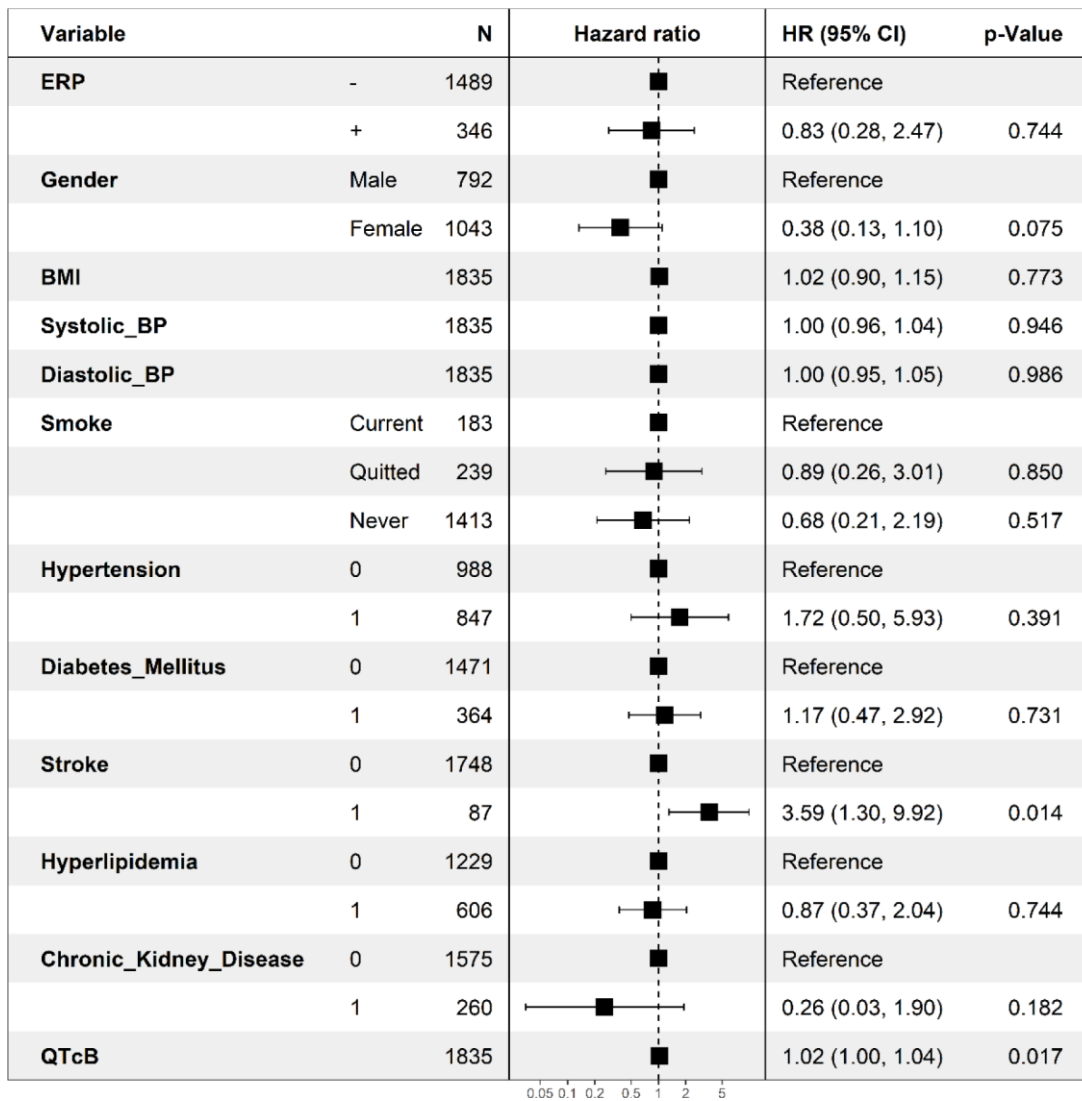

**Supplementary Figure 13. Association between ERP and cardiovascular mortality among individuals aged 65-74 years.** The hazard ratios and *P*-values were calculated by the Cox proportional hazards model after adjusting for covariables.

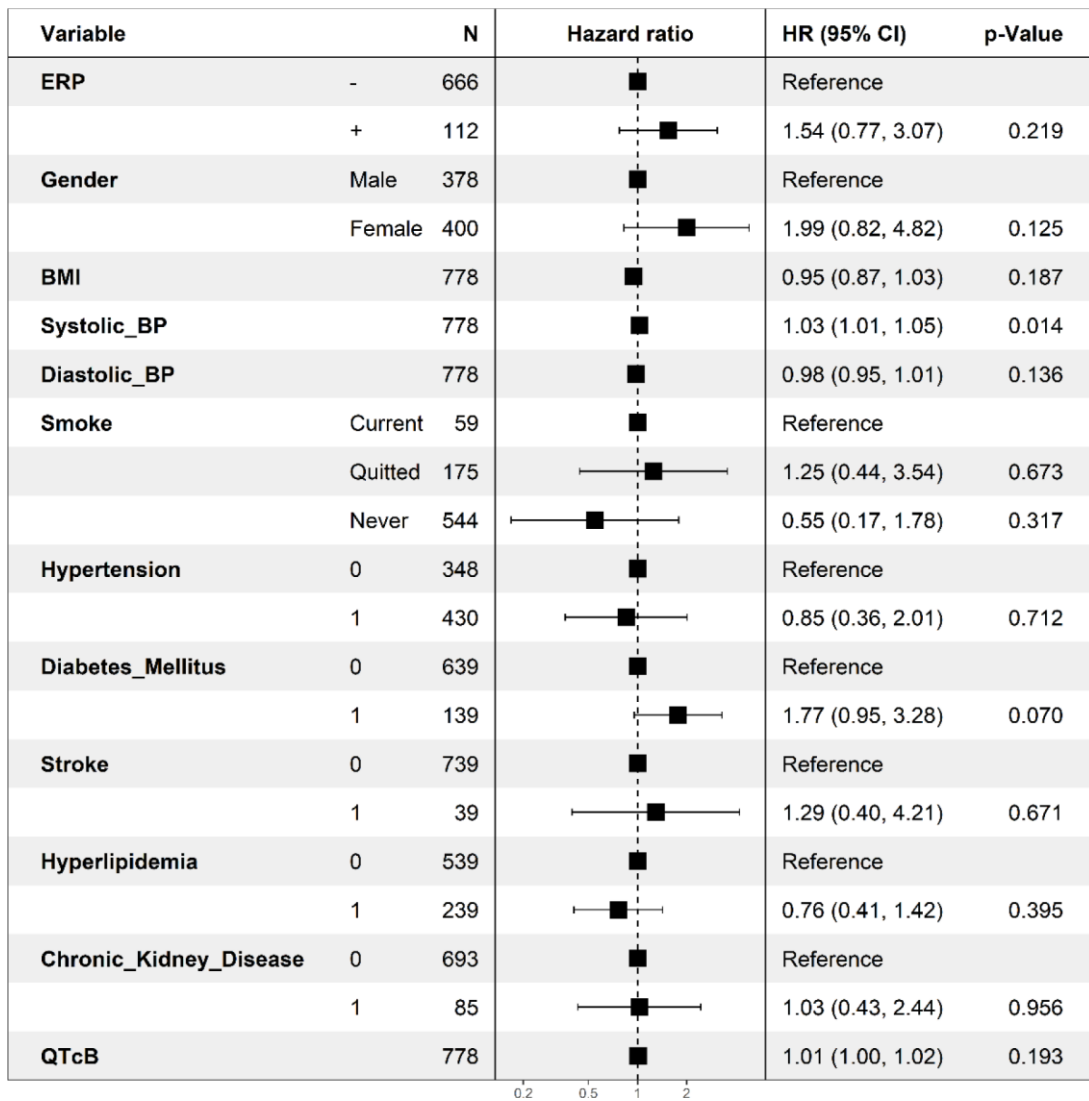

**Supplementary Figure 14. Association between ERP and cardiovascular mortality among individuals aged  $\geq 75$  years.** The hazard ratios and *P*-values were calculated by the Cox proportional hazards model after adjusting for covariables.

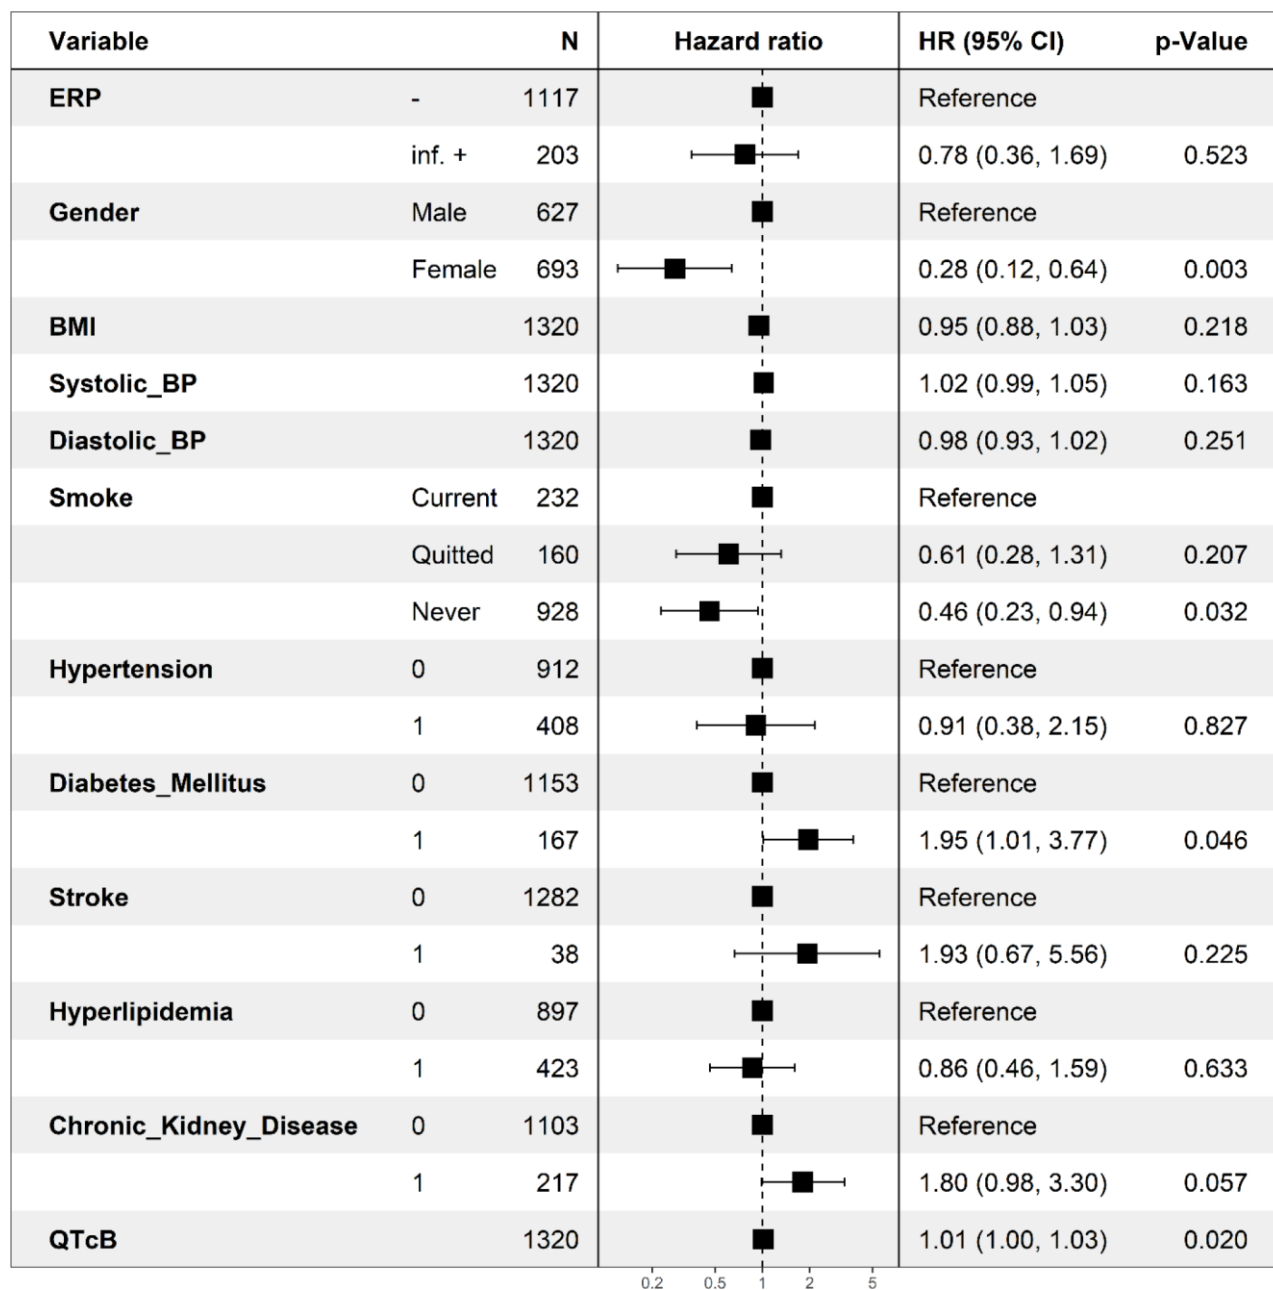

Supplementary Figure 15. Association between positive ERP in inferior leads and all-cause mortality among individuals aged 55-64 years. The hazard ratios and *P*-values were calculated by the Cox proportional hazards model after adjusting for covariables.

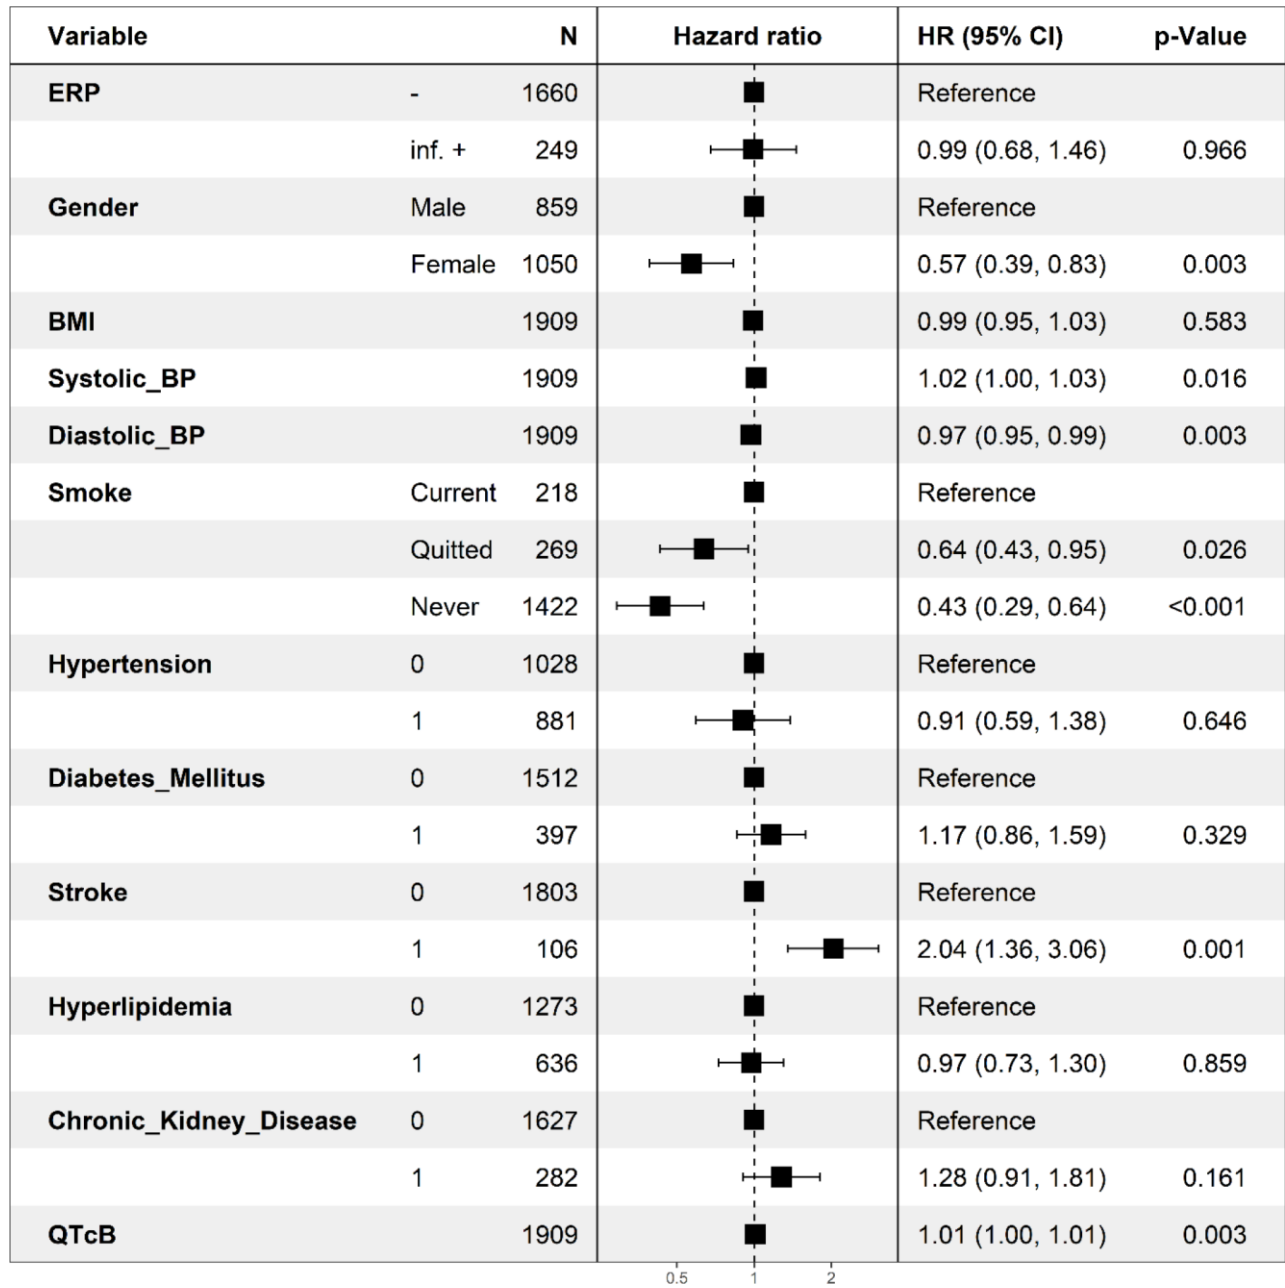

Supplementary Figure 16. Association between positive ERP in the inferior leads and all-cause mortality among individuals aged 65-74 years. The hazard ratios and *P*-values were calculated by the Cox proportional hazards model after adjusting for covariables.



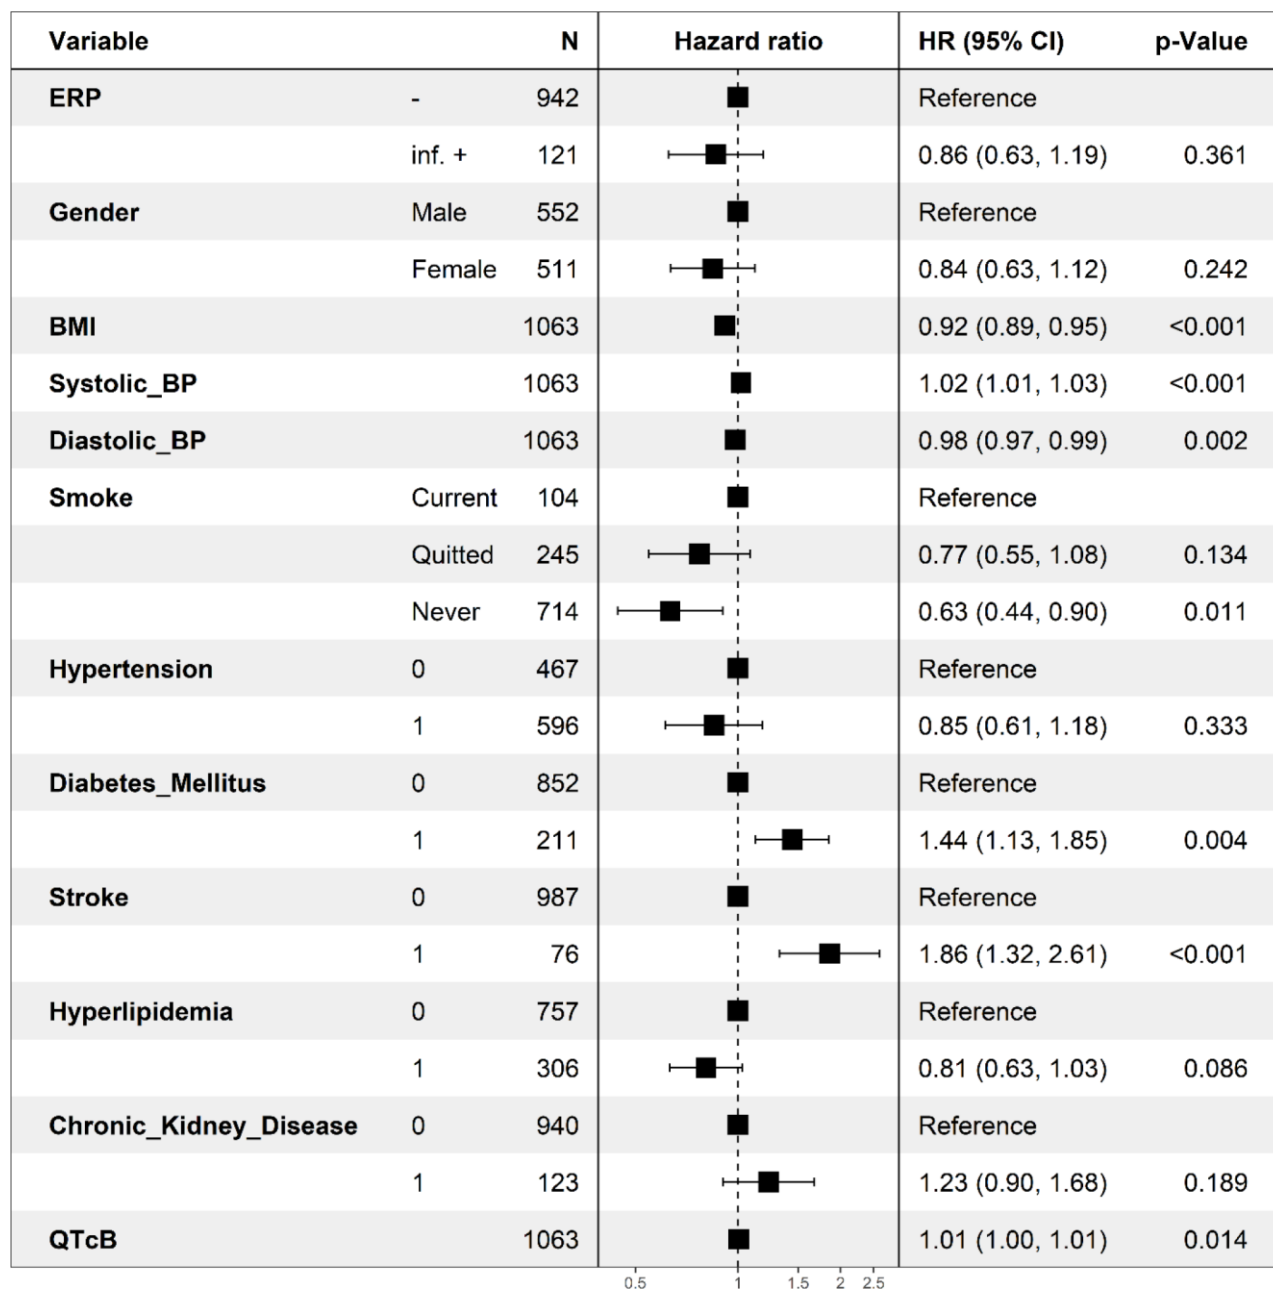

Supplementary Figure 17. Association between positive ERP in the inferior leads and all-cause mortality among individuals aged  $\geq 75$  years. The hazard ratios and *P*-values were calculated by the Cox proportional hazards model after adjusting for covariables.

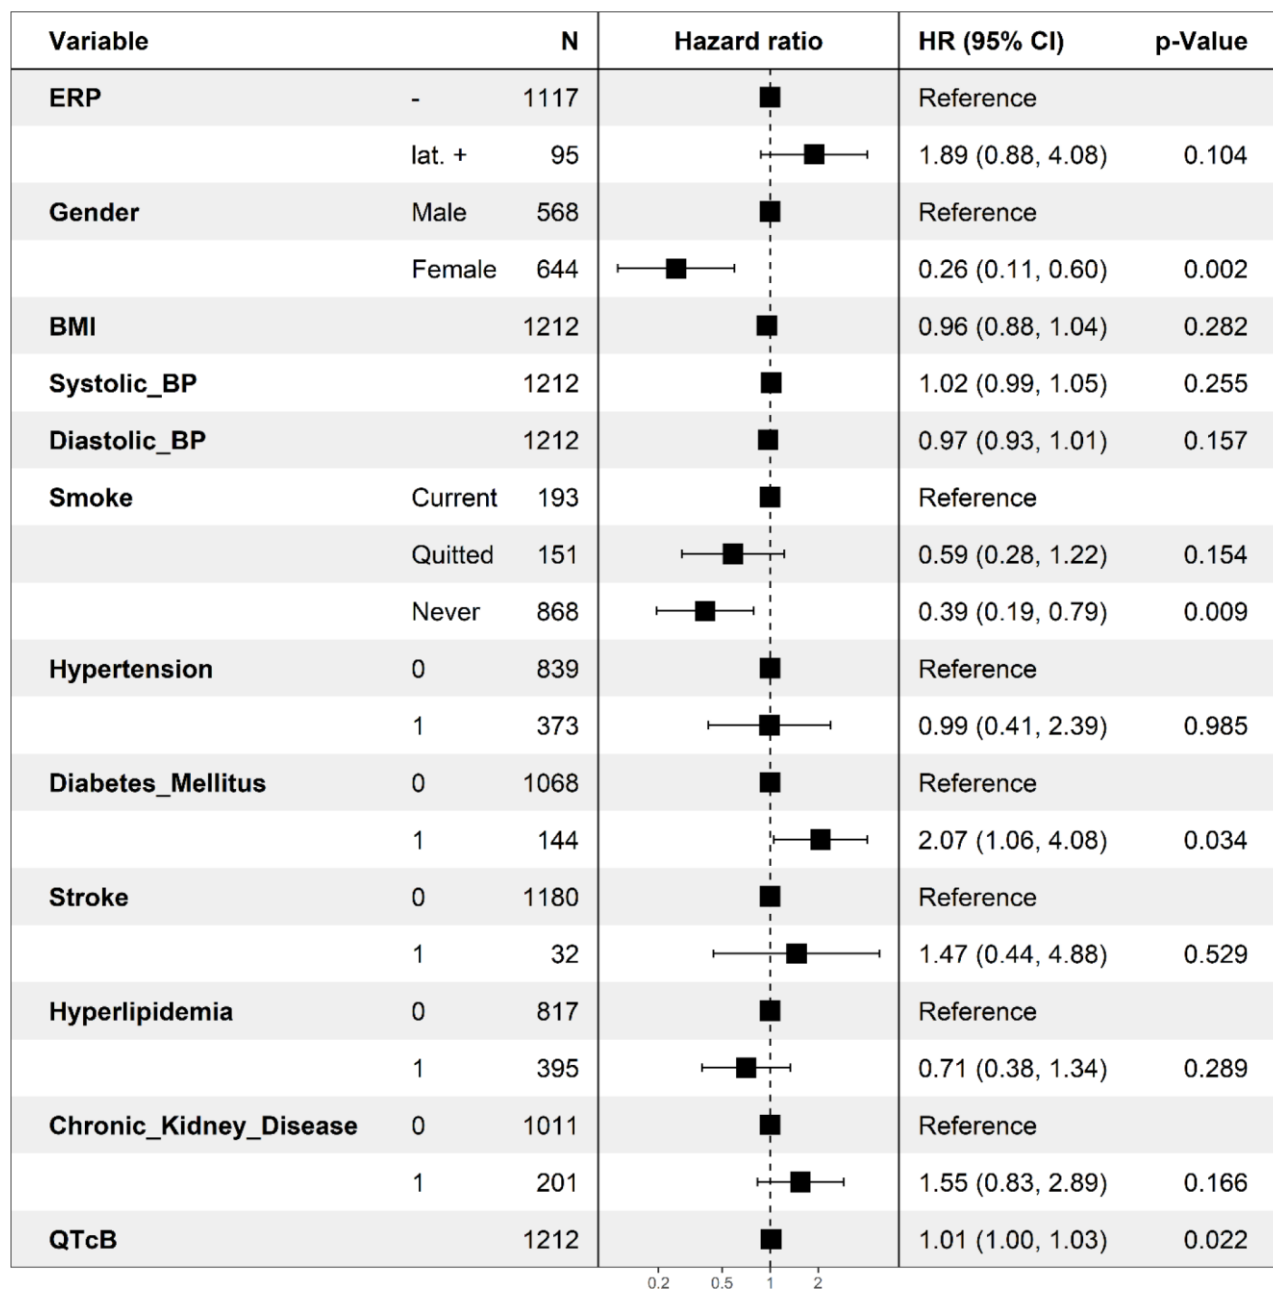

Supplementary Figure 18. Association between positive ERP in the lateral leads and all-cause mortality among individuals aged 55-64 years. The hazard ratios and *P*-values were calculated by the Cox proportional hazards model after adjusting for covariables.

| Variable               |         | N    | Hazard ratio | HR (95% CI)       | p-Value |
|------------------------|---------|------|--------------|-------------------|---------|
| ERP                    | -       | 1660 |              | Reference         |         |
|                        | lat. +  | 95   |              | 1.36 (0.78, 2.35) | 0.277   |
| Gender                 | Male    | 778  |              | Reference         |         |
|                        | Female  | 977  |              | 0.53 (0.36, 0.78) | 0.001   |
| BMI                    |         | 1755 |              | 0.99 (0.95, 1.04) | 0.783   |
| Systolic_BP            |         | 1755 |              | 1.02 (1.01, 1.03) | 0.005   |
| Diastolic_BP           |         | 1755 |              | 0.97 (0.95, 0.99) | 0.002   |
| Smoke                  | Current | 190  |              | Reference         |         |
|                        | Quitted | 235  |              | 0.58 (0.39, 0.89) | 0.011   |
|                        | Never   | 1330 |              | 0.40 (0.27, 0.59) | <0.001  |
| Hypertension           | 0       | 929  |              | Reference         |         |
|                        | 1       | 826  |              | 0.85 (0.55, 1.32) | 0.478   |
| Diabetes_Mellitus      | 0       | 1394 |              | Reference         |         |
|                        | 1       | 361  |              | 1.10 (0.80, 1.52) | 0.565   |
| Stroke                 | 0       | 1651 |              | Reference         |         |
|                        | 1       | 104  |              | 2.11 (1.40, 3.17) | <0.001  |
| Hyperlipidemia         | 0       | 1186 |              | Reference         |         |
|                        | 1       | 569  |              | 0.96 (0.71, 1.31) | 0.802   |
| Chronic_Kidney_Disease | 0       | 1496 |              | Reference         |         |
|                        | 1       | 259  |              | 1.24 (0.86, 1.78) | 0.253   |
| QTcB                   |         | 1755 |              | 1.01 (1.00, 1.02) | 0.001   |

Supplementary Figure 19. Association between positive ERP in the lateral leads and all-cause mortality among individuals aged 65-74 years. The hazard ratios and *P*-values were calculated by the Cox proportional hazards model after adjusting for covariables.

| Variable               |         | N   | Hazard ratio | HR (95% CI)       | p-Value |
|------------------------|---------|-----|--------------|-------------------|---------|
| ERP                    | -       | 942 |              | Reference         |         |
|                        | lat. +  | 24  |              | 1.24 (0.66, 2.35) | 0.501   |
| Gender                 | Male    | 489 |              | Reference         |         |
|                        | Female  | 477 |              | 0.76 (0.57, 1.02) | 0.066   |
| BMI                    |         | 966 |              | 0.91 (0.88, 0.95) | <0.001  |
| Systolic_BP            |         | 966 |              | 1.02 (1.01, 1.03) | <0.001  |
| Diastolic_BP           |         | 966 |              | 0.98 (0.97, 1.00) | 0.012   |
| Smoke                  | Current | 85  |              | Reference         |         |
|                        | Quitted | 219 |              | 0.85 (0.58, 1.24) | 0.393   |
|                        | Never   | 662 |              | 0.74 (0.51, 1.09) | 0.130   |
| Hypertension           | 0       | 424 |              | Reference         |         |
|                        | 1       | 542 |              | 0.80 (0.57, 1.13) | 0.206   |
| Diabetes_Mellitus      | 0       | 775 |              | Reference         |         |
|                        | 1       | 191 |              | 1.38 (1.06, 1.80) | 0.017   |
| Stroke                 | 0       | 899 |              | Reference         |         |
|                        | 1       | 67  |              | 1.94 (1.35, 2.79) | <0.001  |
| Hyperlipidemia         | 0       | 680 |              | Reference         |         |
|                        | 1       | 286 |              | 0.81 (0.62, 1.05) | 0.106   |
| Chronic_Kidney_Disease | 0       | 855 |              | Reference         |         |
|                        | 1       | 111 |              | 1.20 (0.86, 1.65) | 0.280   |
| QTcB                   |         | 966 |              | 1.00 (1.00, 1.01) | 0.052   |

Supplementary Figure 20. Association between positive ERP in the lateral leads and all-cause mortality among those aged  $\geq 75$  years. The hazard ratios and *P*-values were calculated by the Cox proportional hazards model after adjusting for covariables.

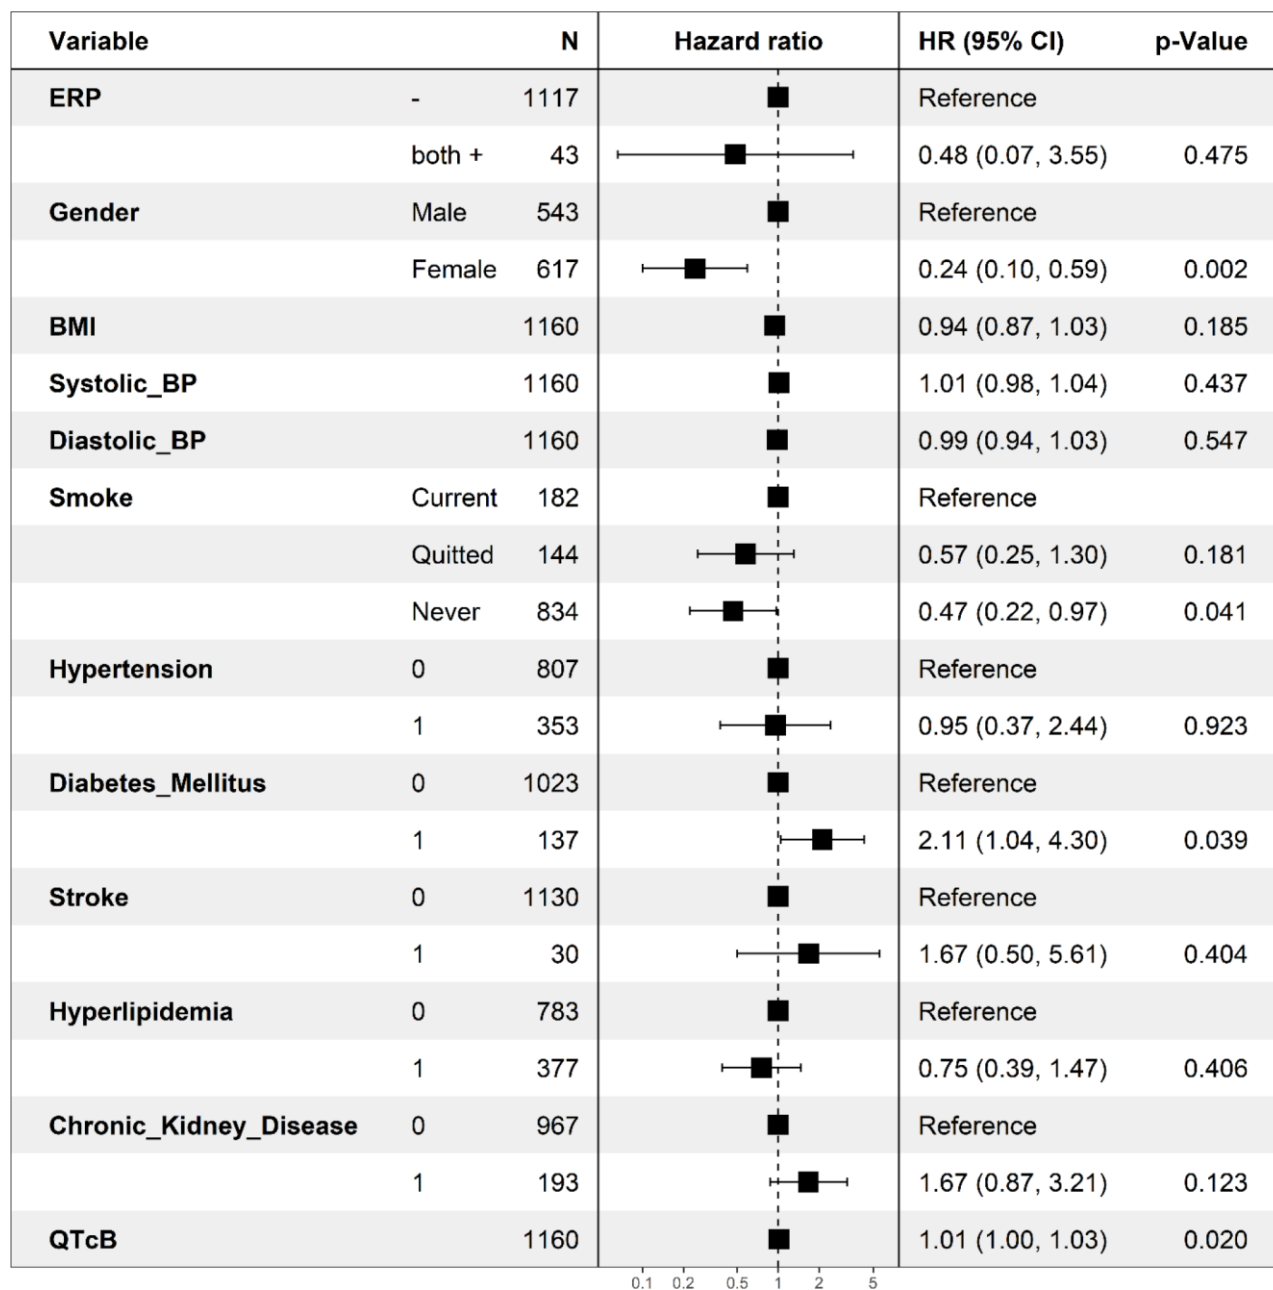

Supplementary Figure 21. Association between positive ERP in both inferior leads and lateral leads and all-cause mortality among individuals aged 55-64 years. The hazard ratios and *P*-values were calculated by the Cox proportional hazards model after adjusting for covariables.

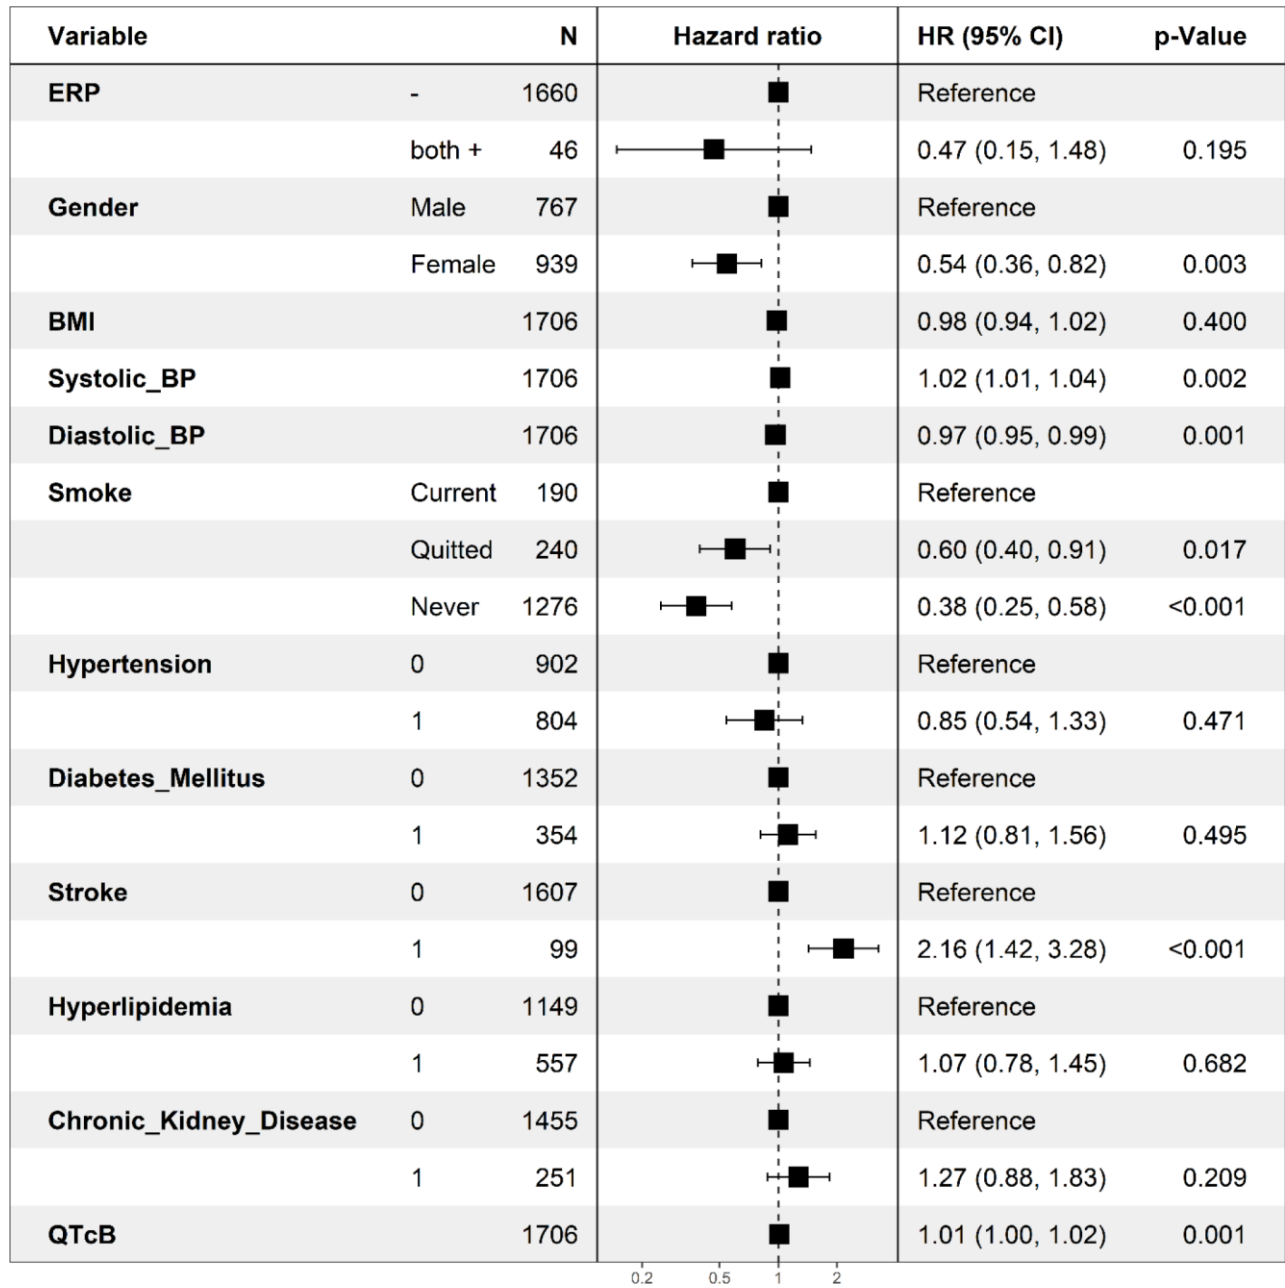

Supplementary Figure 22. Association between positive ERP in both inferior and lateral leads and all-cause mortality among individuals aged 65-74 years. The hazard ratios and *P*-values were calculated by the Cox proportional hazards model after adjusting for covariables.

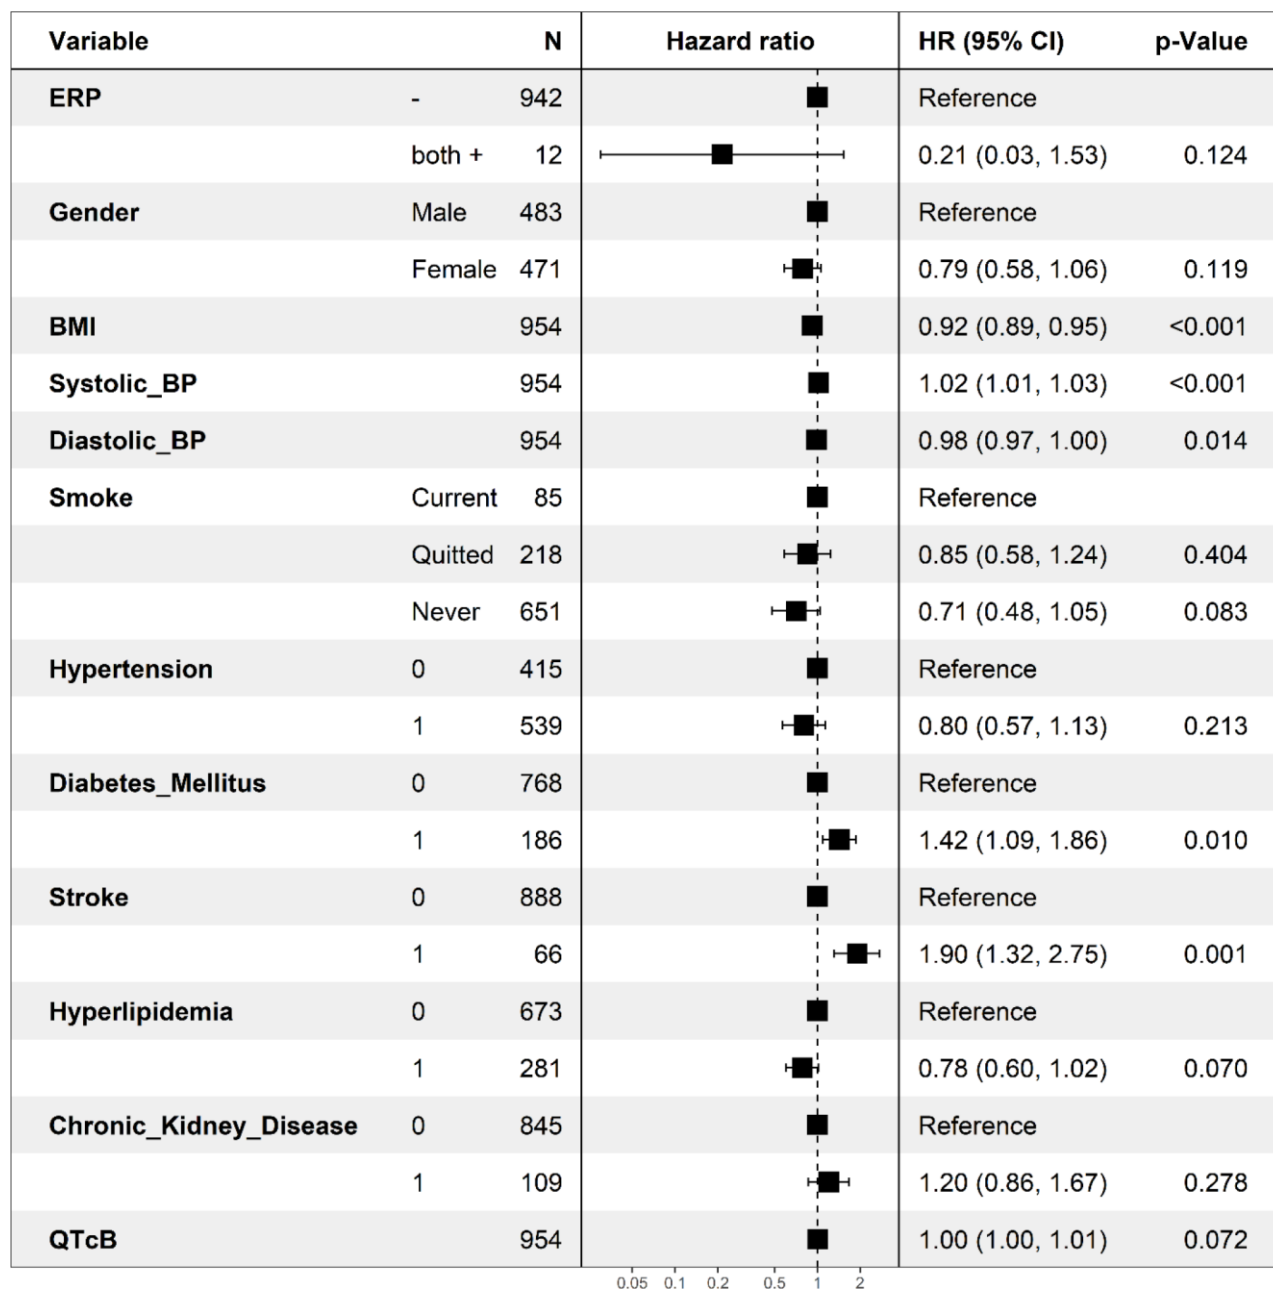

**Supplementary Figure 23. Association between positive ERP in both inferior and lateral leads and all-cause mortality among individuals aged  $\geq 75$  years.** The hazard ratios and *P*-values were calculated by the Cox proportional hazards model after adjusting for covariables.

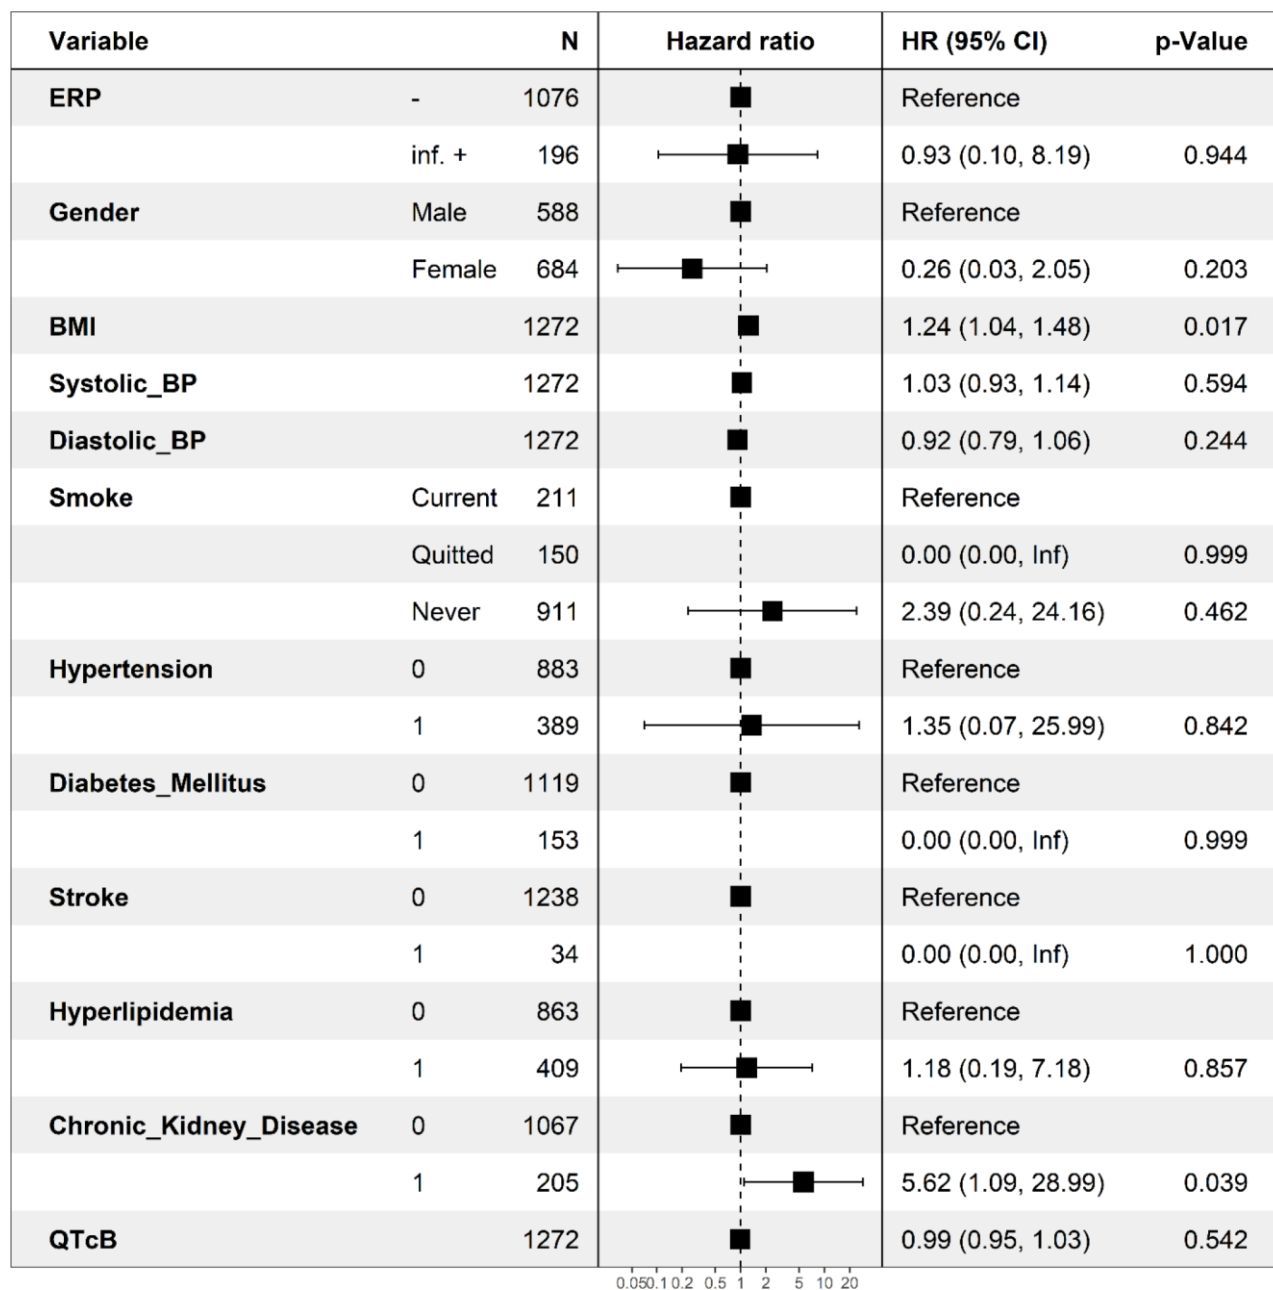

Supplementary Figure 24. Association between positive ERP in the inferior leads and cardiovascular mortality among individuals aged 55-64 years. The hazard ratios and *P*-values were calculated by the Cox proportional hazards model after adjusting for covariables.



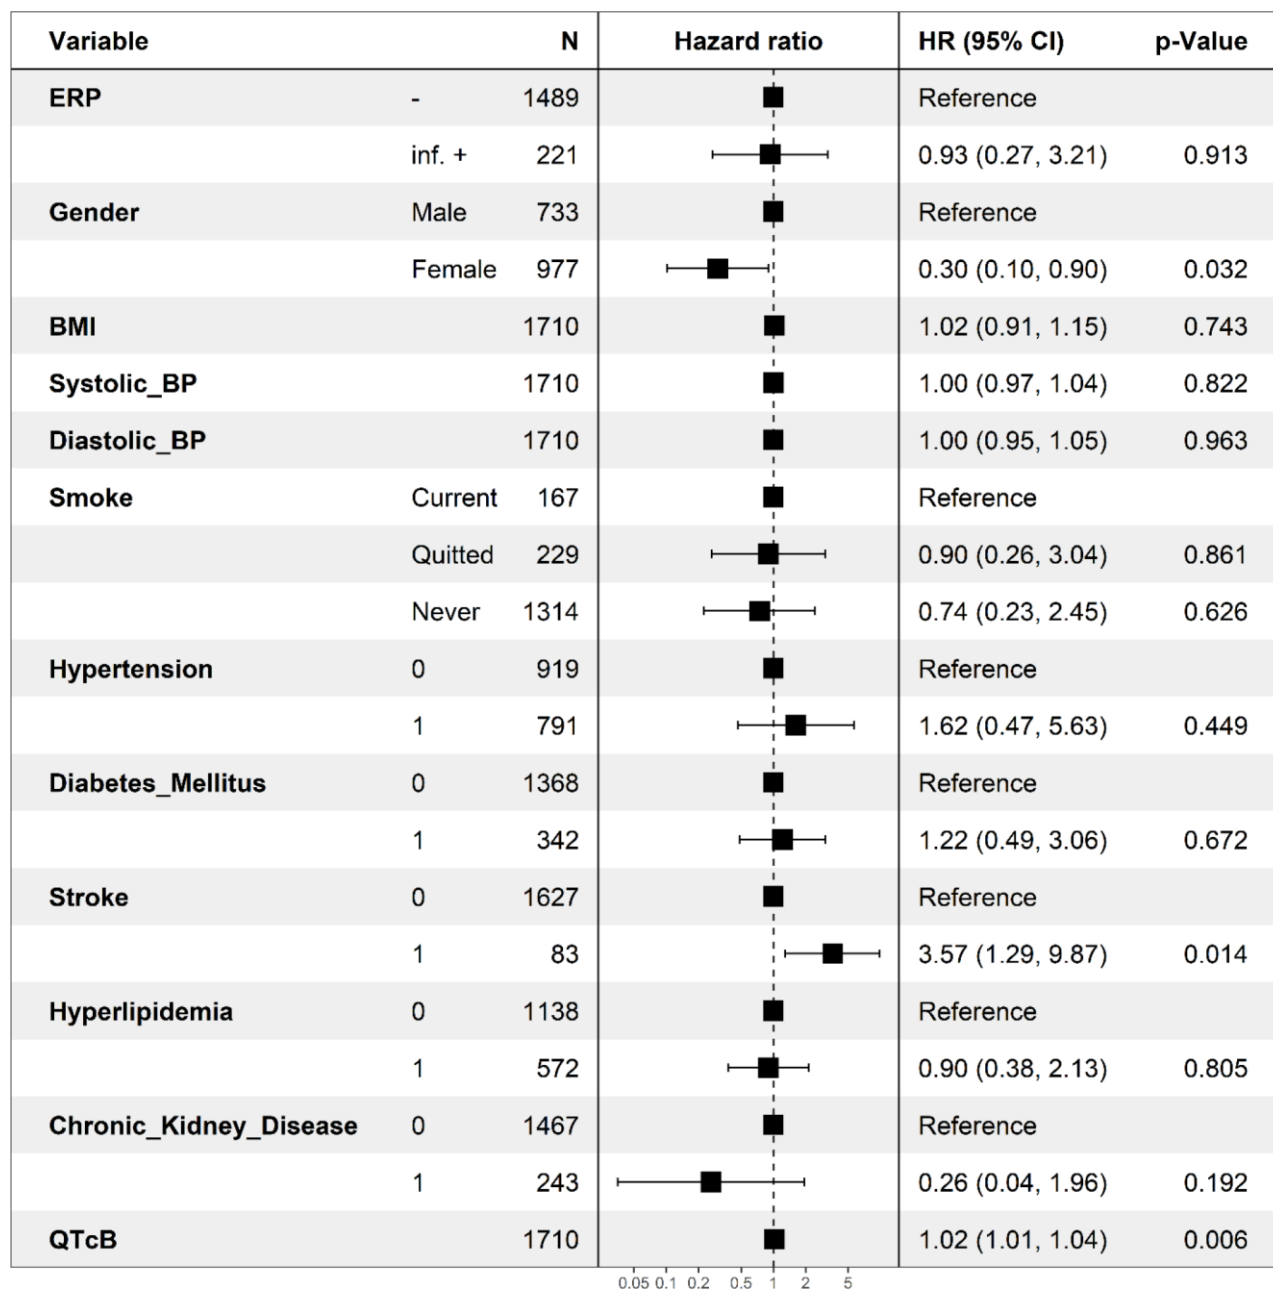

Supplementary Figure 25. Association between positive ERP in the inferior leads and cardiovascular mortality among individuals aged 65-74 years. The hazard ratios and *P*-values were calculated by the Cox proportional hazards model after adjusting for covariables.

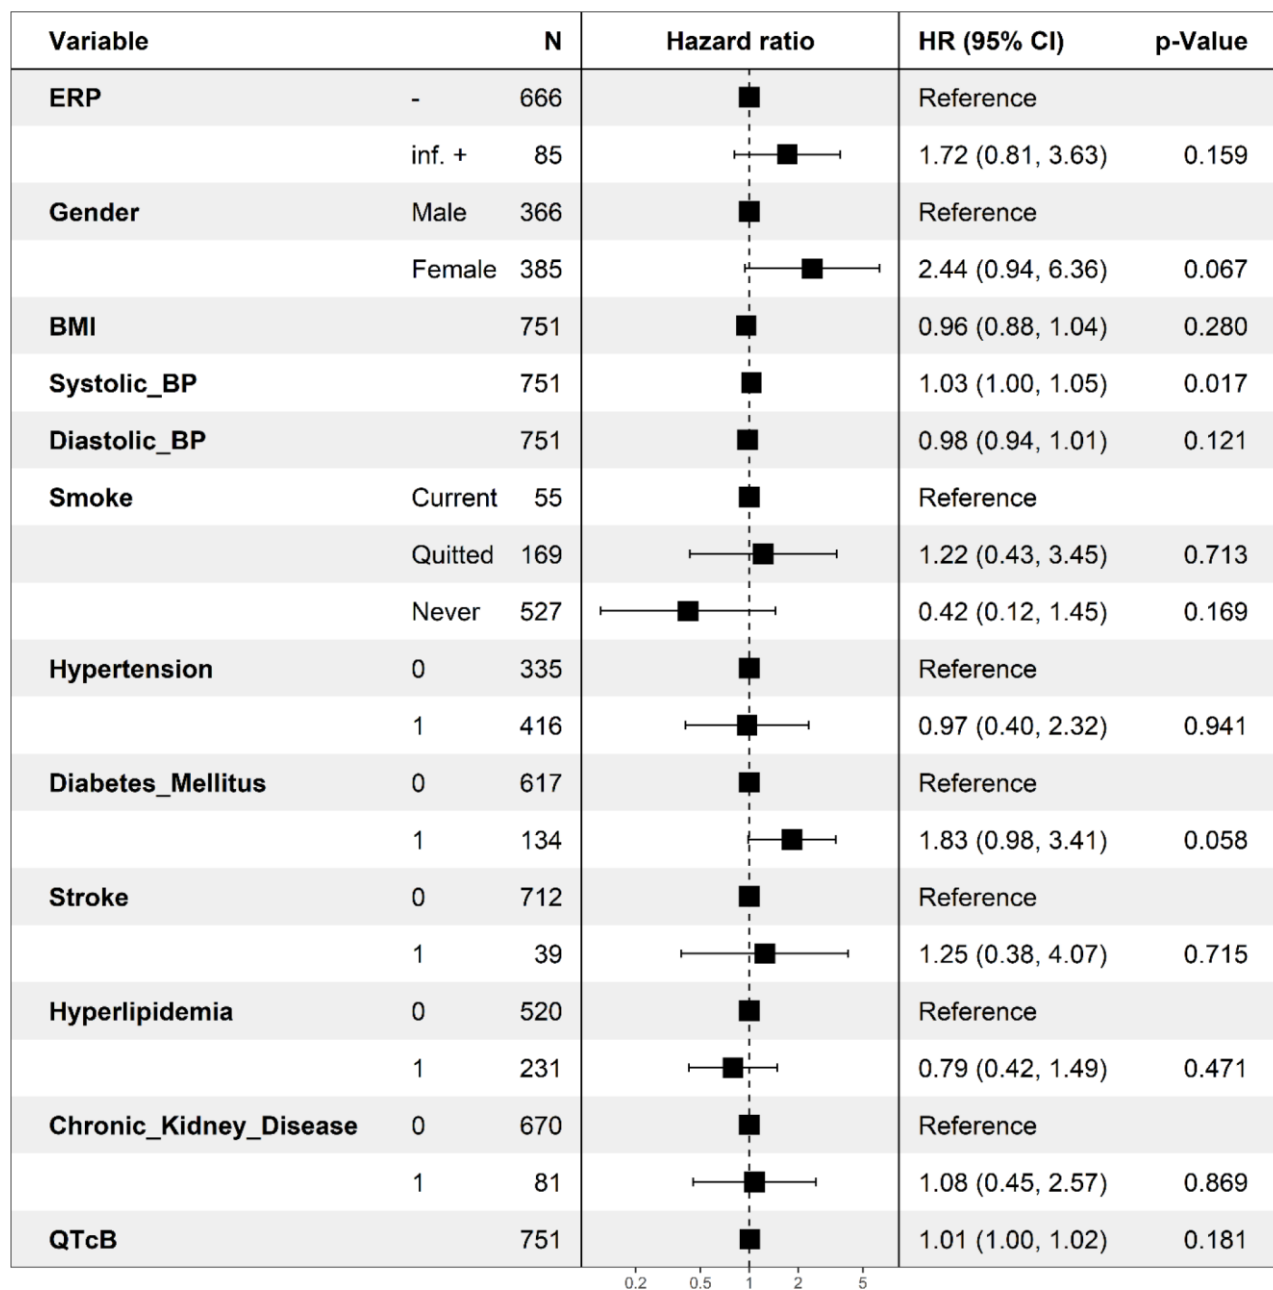

Supplementary Figure 26. Association between positive ERP in the inferior leads and cardiovascular mortality among individuals aged  $\geq 75$  years. The hazard ratios and *P*-values were calculated by the Cox proportional hazards model after adjusting for covariables.

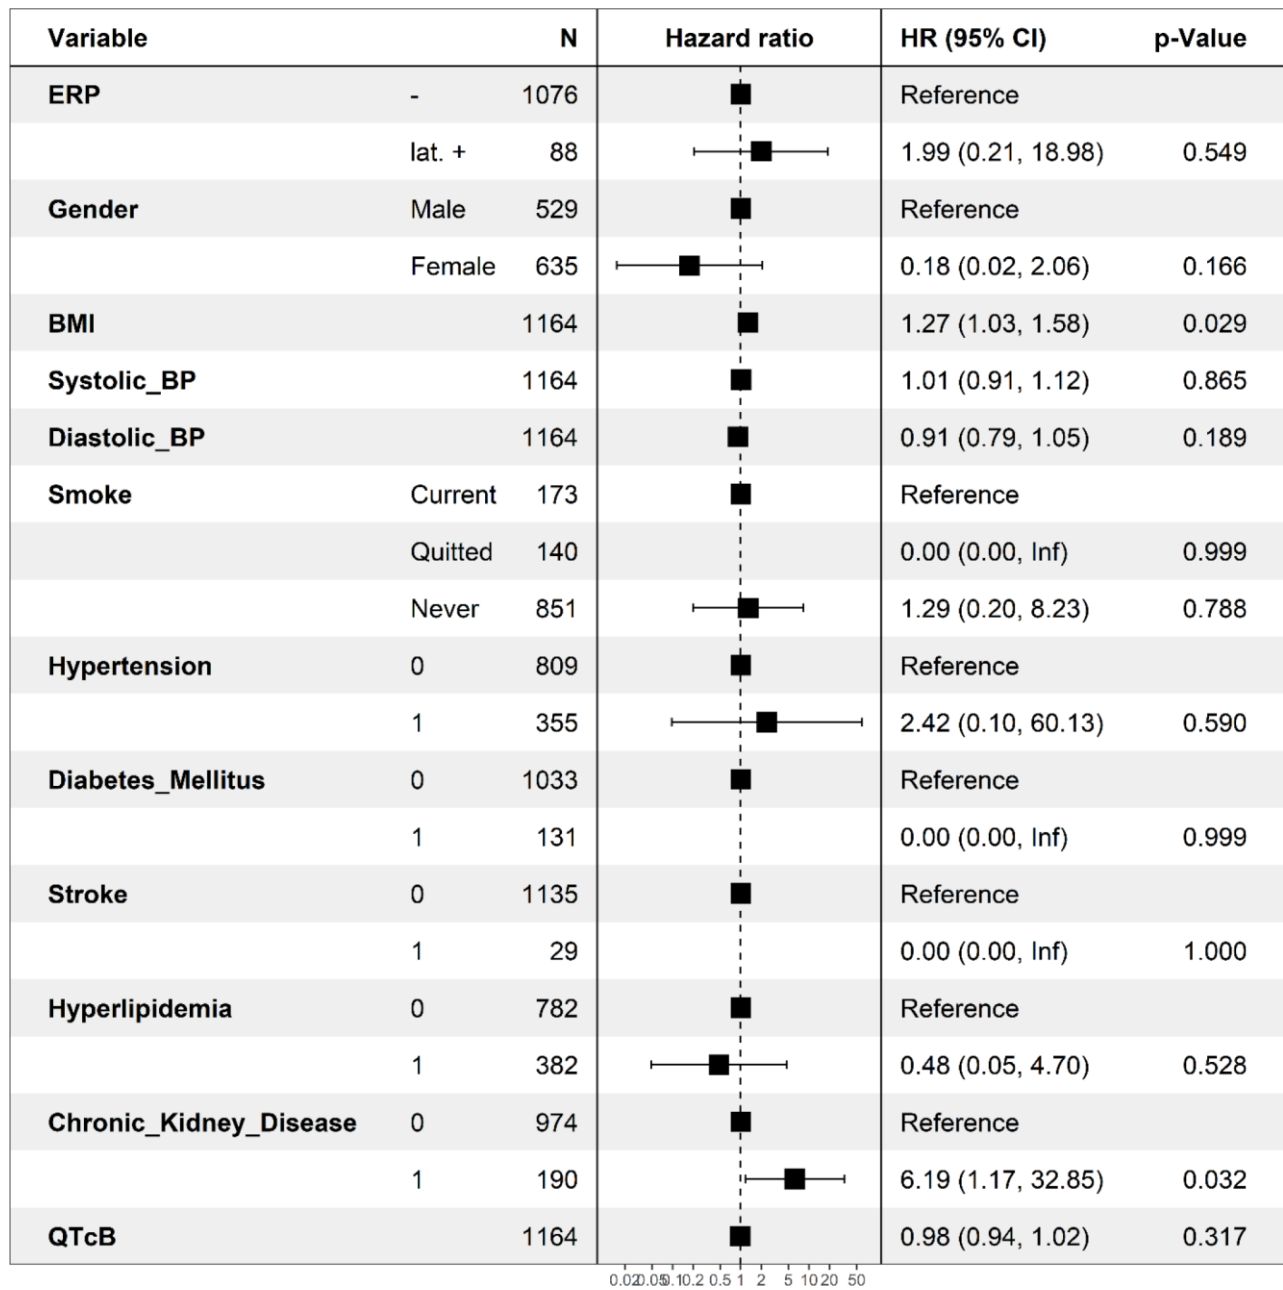

Supplementary Figure 27. Association between positive ERP in the lateral leads and cardiovascular mortality among individuals aged 55-64 years. The hazard ratios and *P*-values were calculated by the Cox proportional hazards model after adjusting for covariables.

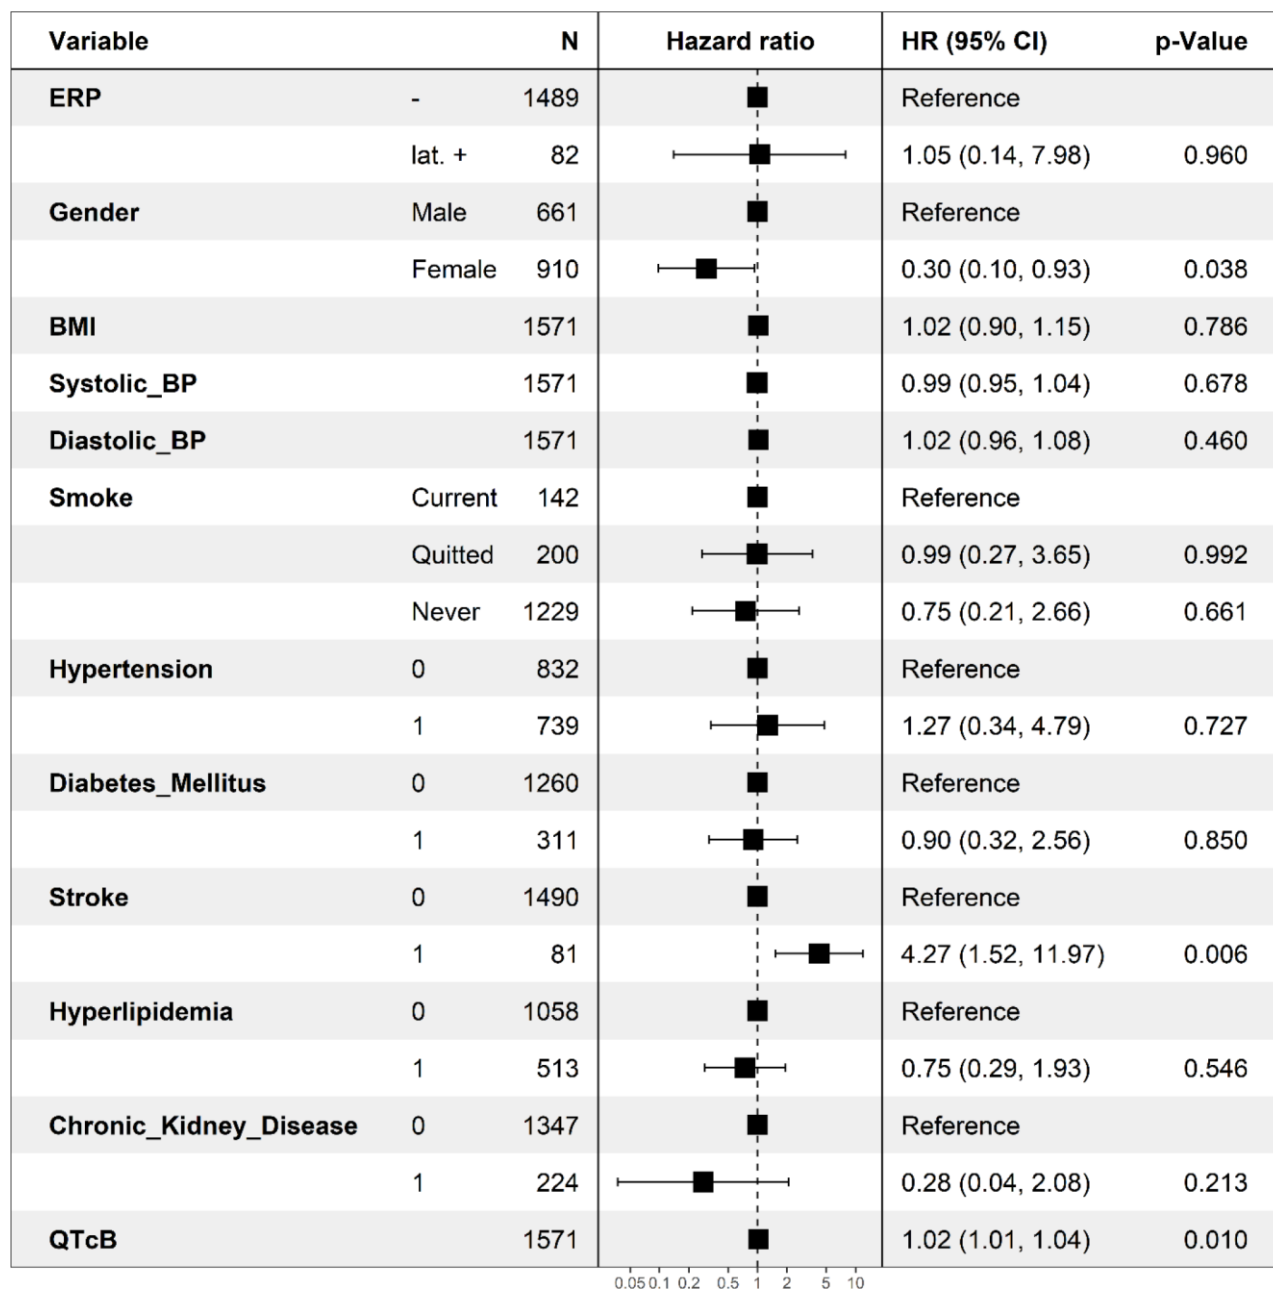

Supplementary Figure 28. Association between positive ERP in the lateral leads and cardiovascular mortality among individuals aged 65-74 years. The hazard ratios and *P*-values were calculated by the Cox proportional hazards model after adjusting for covariables.

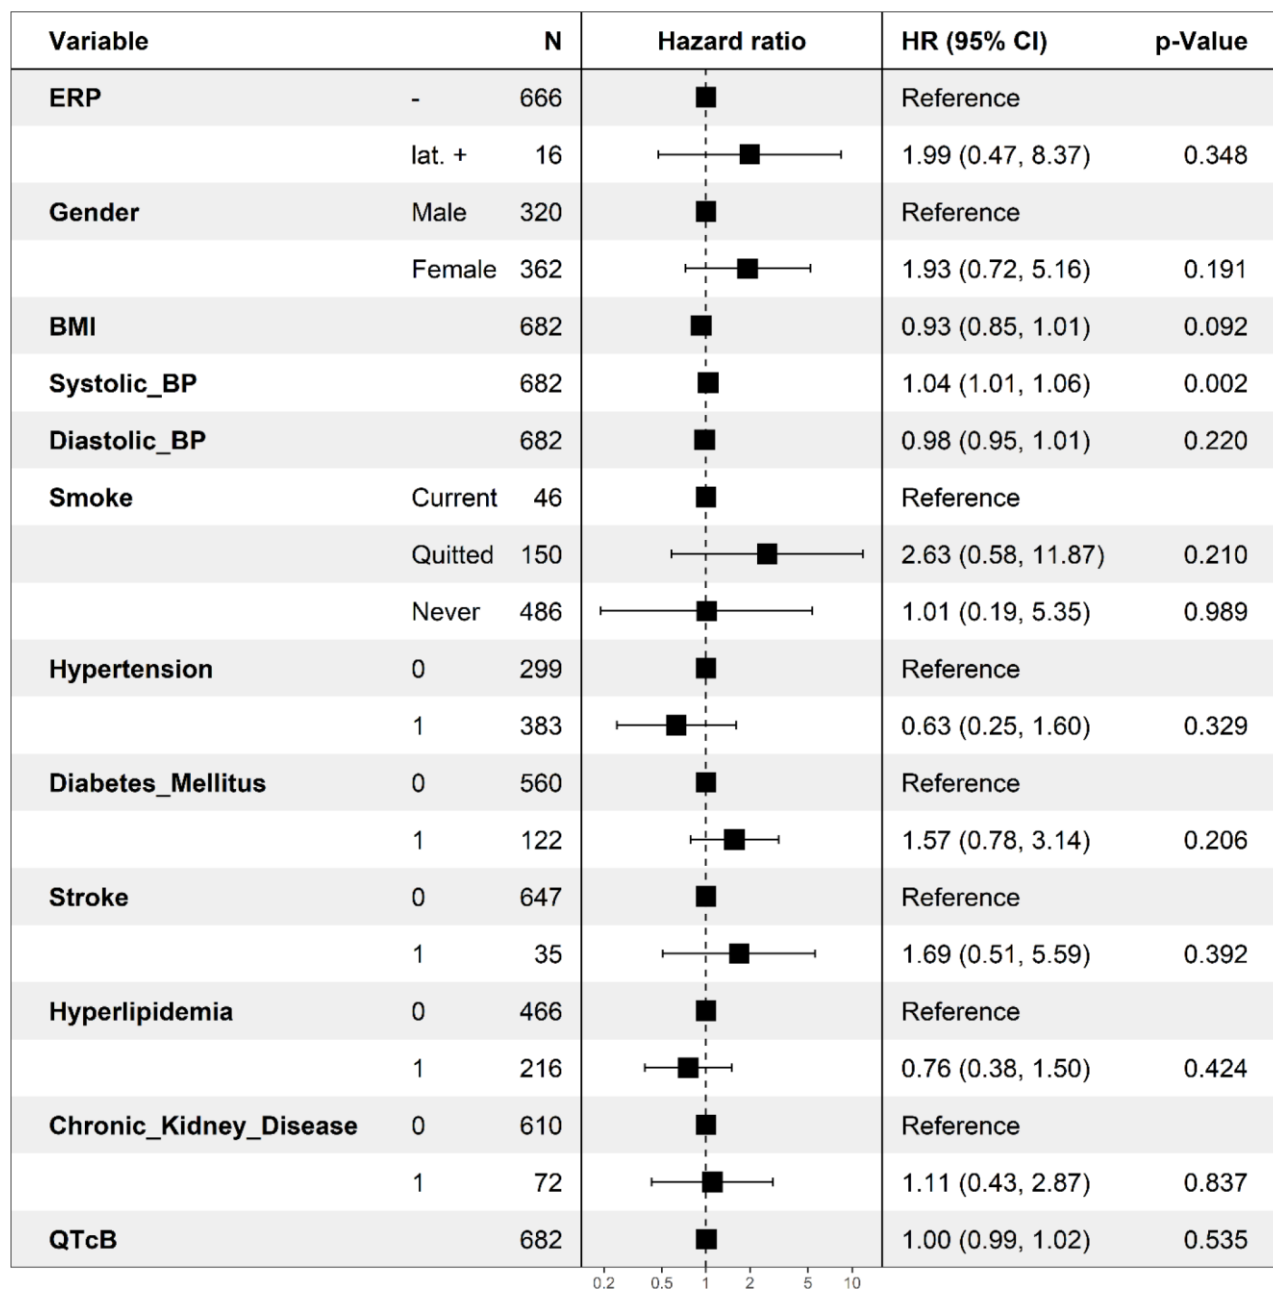

Supplementary Figure 29. Associations between positive ERP in the lateral leads and cardiovascular mortality among individuals aged  $\geq 75$  years. The hazard ratios and *P*-values were calculated by the Cox proportional hazards model after adjusting for covariables.

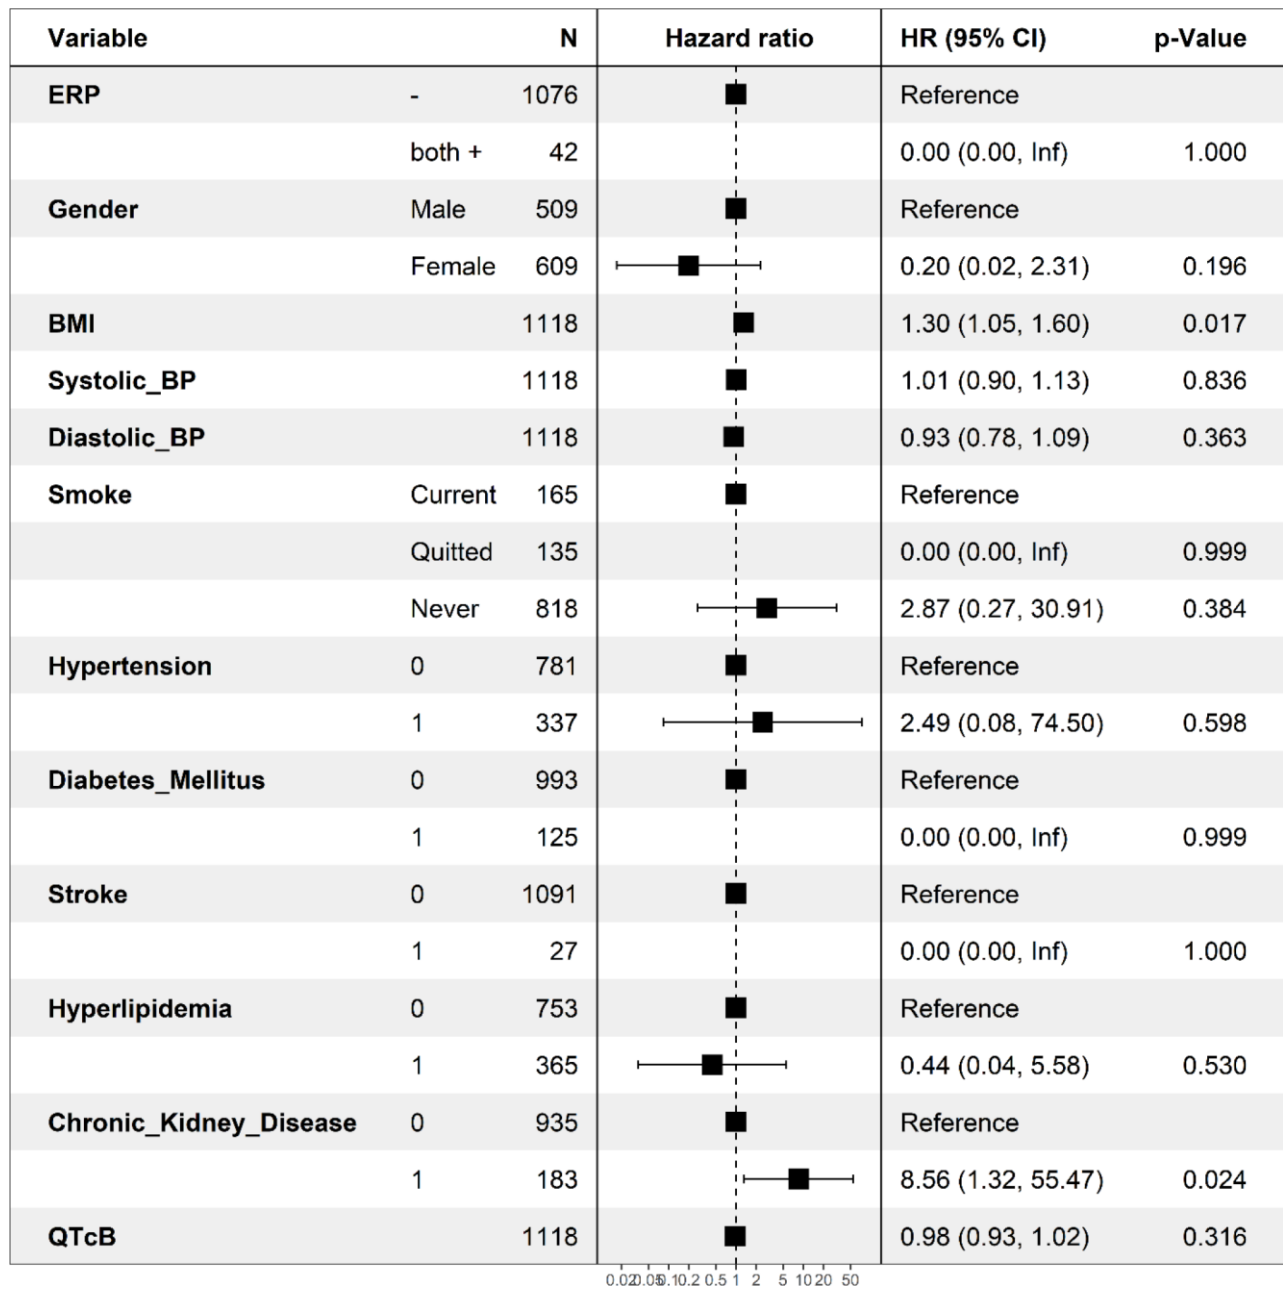

**Supplementary Figure 30. Association between positive ERP in both inferior and lateral leads and cardiovascular mortality among individuals aged 55-64 years.** The hazard ratios and *P*-values were calculated by the Cox proportional hazards model after adjusting for covariables.

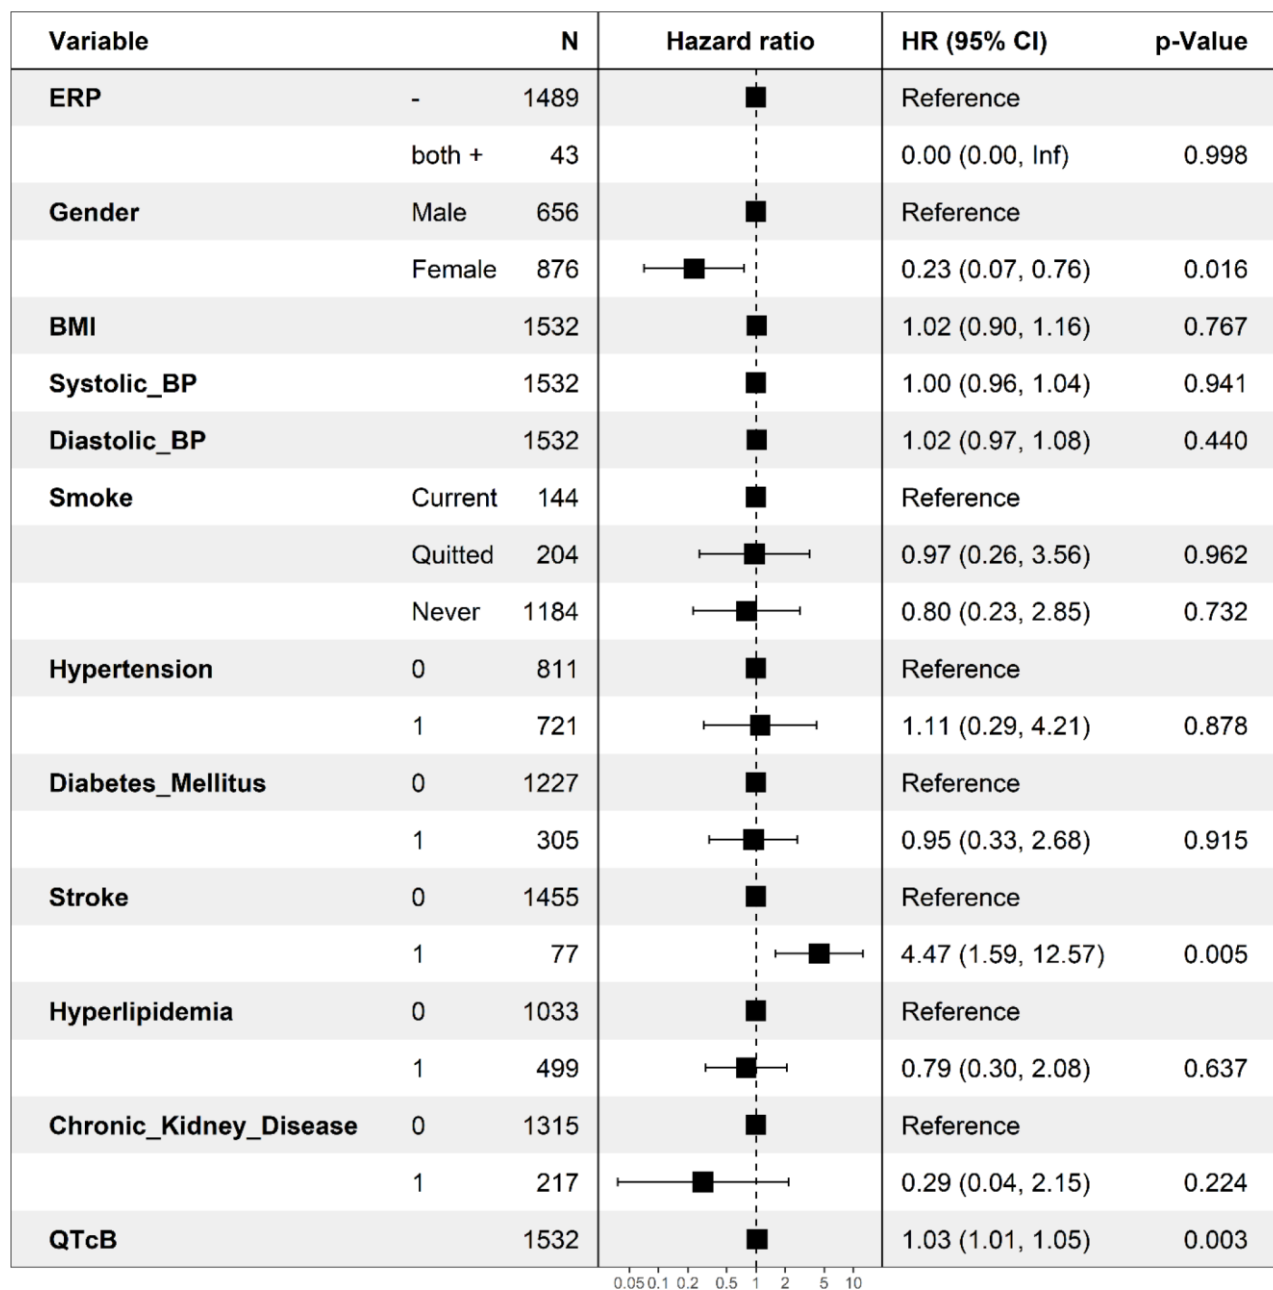

**Supplementary Figure 31. Association between positive ERP in both inferior and lateral leads and cardiovascular mortality among individuals aged 65-74 years.** The hazard ratios and *P*-values were calculated by the Cox proportional hazards model after adjusting for covariables.

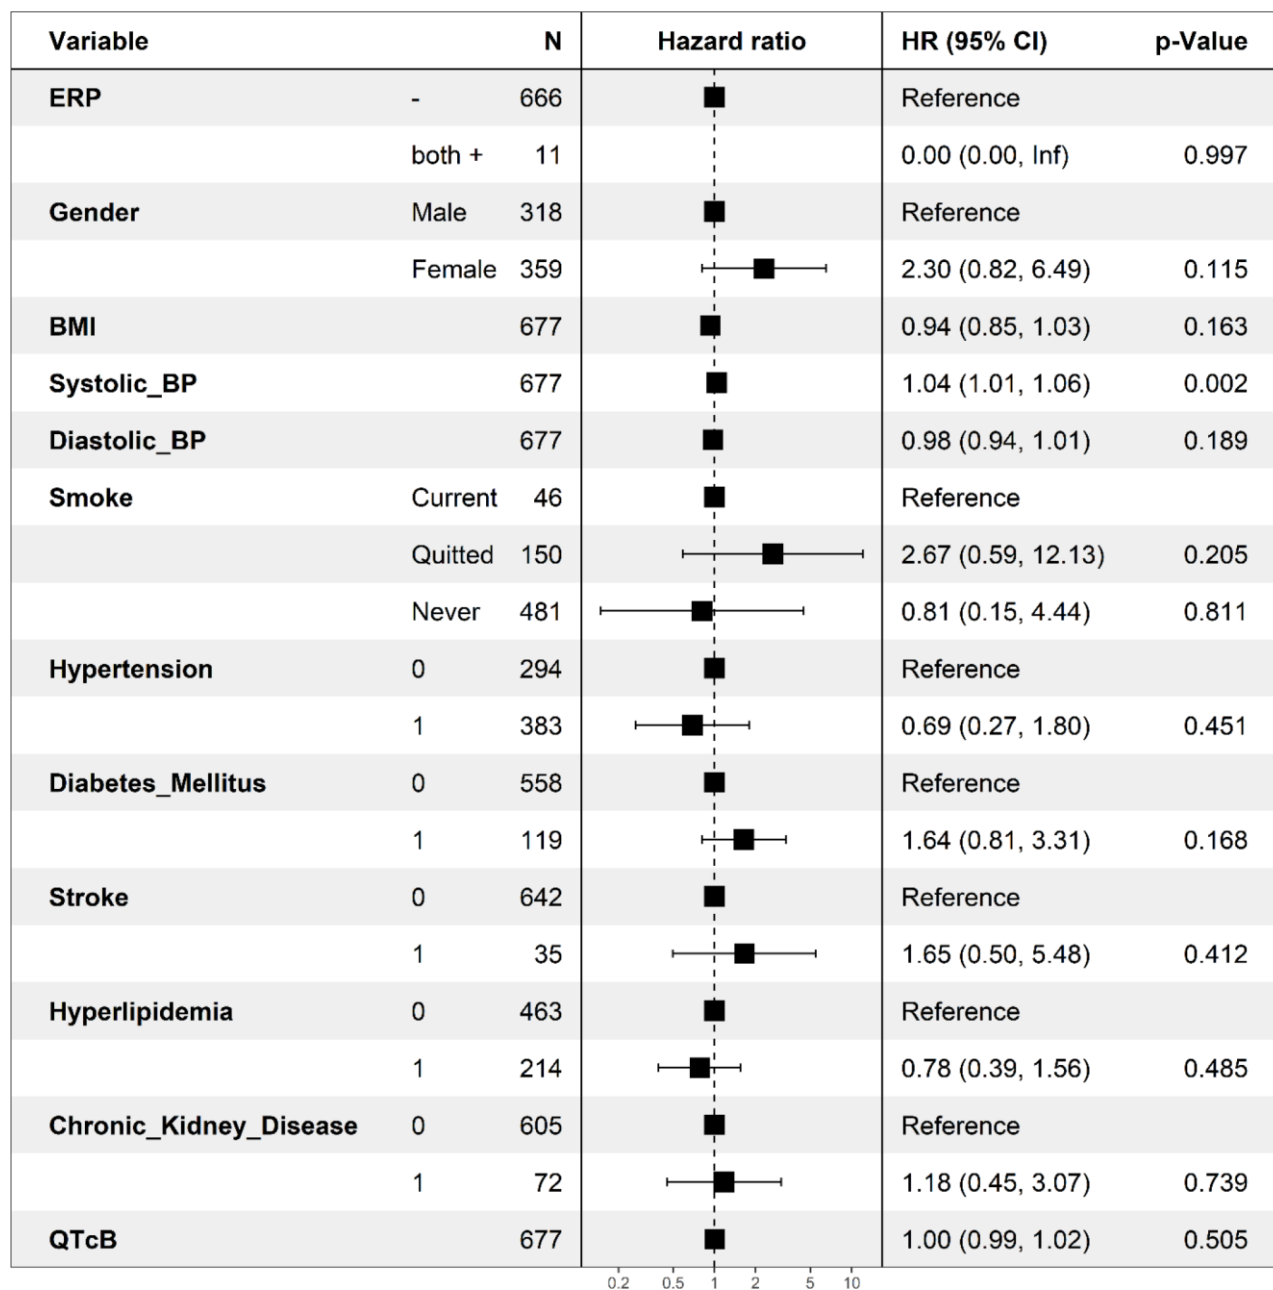

**Supplementary Figure 32. Association between positive ERP in both inferior and lateral leads and cardiovascular mortality among those aged  $\geq 75$  years.** The hazard ratios and *P*-values were calculated by the Cox proportional hazards model after adjusting for covariables.
